# Supplementary material for: Revisiting the debate: documenting biodiversity in the age of digital and artificially generated images
Source: Copernicus journal article supplement (doi:10.5194/we-23-135-2023), 2023-12-07
Supplement: Supplementary file 1 [file we-23-135-2023-supplement.zip]

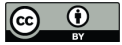

## *Supplement of*

# **Revisiting the debate: documenting biodiversity in the age of digital and artificially generated images**

**Diego Sousa Campos et al.**

*Correspondence to:* Felipe Polivanov Ottoni (fpottoni@gmail.com)

- we-23-135-2023-supplement-title-page.pdf
- S1\_Realistic\_appeal\_AI\_Generated\_images.xlsx
- Supplementary file S1.docx

The copyright of individual parts of the supplement might differ from the article licence.
