# Supplementary material for: Revisiting the debate: documenting biodiversity in the age of digital and artificially generated images
Source: Copernicus journal article supplement (doi:10.5194/we-23-135-2023), 2023-12-07
Supplement: Supplementary file 2 [file we-23-135-2023-supplement.zip]

Archive with 3 entries (3 files):
- we-23-135-2023-supplement-title-page.pdf
- Supplementary file S1.docx
- S1_Realistic_appeal_AI_Generated_images.xlsx
