# Supplementary material for: Revisiting the debate: documenting biodiversity in the age of digital and artificially generated images
Source: Copernicus journal article supplement (doi:10.5194/we-23-135-2023), 2023-12-07
Supplement: Supplementary file 2 [file we-23-135-2023-supplement.zip › S1_Realistic_appeal_AI_Generated_images.xlsx]

## Sheet: Responses to online survey
Suplementary file S1 - Suplementary file S1 - Database of the survey, each line is the response of one interviewed person. Respective values are in columns K to S for calculation of descriptive statistics
Carimbo de data/hora	Guppy	Hummingbird	Seagull	Fly	Shark+fisherman	Leopard	Polarbear	Stranded shark	Catfish in a jar	Guppy	Hummingbird	Seagull	Fly	Shark+fisherman	Leopard	Polarbear	Stranded shark	Catfish in a jar
2023-04-24 11:11:47	Real, only processed	False, but convincing	Not sure if it's real or not	Real, but heavily modified	Completely false	Real, only processed	Not sure if it's real or not	Not sure if it's real or not	Real, only processed	5	2	3	4	1	5	3	3	5
2023-04-24 11:13:00	Completely false	Completely false	Completely false	Completely false	Completely false	Real, only processed	Completely false	Completely false	Completely false	1	1	1	1	1	5	1	1	1
2023-04-24 11:16:22	Real, only processed	False, but convincing	Real, but heavily modified	Real, but heavily modified	Real, only processed	Real, only processed	Not sure if it's real or not	Not sure if it's real or not	Real, but heavily modified	5	2	4	4	5	5	3	3	4
2023-04-24 11:20:33	Real, but heavily modified	False, but convincing	Real, only processed	Real, only processed	Real, only processed	Real, only processed	Real, only processed	Not sure if it's real or not	Real, only processed	4	2	5	5	5	5	5	3	5
2023-04-24 11:21:53	Real, but heavily modified	Real, only processed	Real, only processed	Real, but heavily modified	Real, only processed	Real, but heavily modified	Real, only processed	Real, only processed	Real, only processed	4	5	5	4	5	4	5	5	5
2023-04-24 11:24:56	Real, only processed	Completely false	Real, only processed	Real, only processed	False, but convincing	Real, only processed	Completely false	Not sure if it's real or not	Real, but heavily modified	5	1	5	5	2	5	1	3	4
2023-04-24 11:26:15	Real, only processed	Not sure if it's real or not	Real, only processed	Real, only processed	Completely false	Real, only processed	Real, only processed	Real, only processed	Real, only processed	5	3	5	5	1	5	5	5	5
2023-04-24 11:27:19	Real, only processed	False, but convincing	Not sure if it's real or not	Real, but heavily modified	Real, only processed	Real, only processed	False, but convincing	False, but convincing	Real, only processed	5	2	3	4	5	5	2	2	5
2023-04-24 11:30:16	Real, only processed	Real, but heavily modified	Real, but heavily modified	Real, only processed	False, but convincing	Not sure if it's real or not	Real, but heavily modified	False, but convincing	Real, only processed	5	4	4	5	2	3	4	2	5
2023-04-24 11:31:48	Not sure if it's real or not	Completely false	Not sure if it's real or not	Real, but heavily modified	Completely false	Real, only processed	Completely false	False, but convincing	Not sure if it's real or not	3	1	3	4	1	5	1	2	3
2023-04-24 11:35:56	Real, only processed	Not sure if it's real or not	Real, only processed	Not sure if it's real or not	Completely false	Real, only processed	Completely false	Real, only processed	Completely false	5	3	5	3	1	5	1	5	1
2023-04-24 11:36:03	Not sure if it's real or not	Real, only processed	Real, only processed	Not sure if it's real or not	Real, only processed	Real, only processed	Real, only processed	Real, only processed	Real, only processed	3	5	5	3	5	5	5	5	5
2023-04-24 11:37:27	Real, only processed	Completely false	Not sure if it's real or not	Not sure if it's real or not	Real, only processed	Real, only processed	Real, but heavily modified	False, but convincing	Real, but heavily modified	5	1	3	3	5	5	4	2	4
2023-04-24 11:37:32	Real, only processed	Completely false	Completely false	Completely false	Completely false	Real, only processed	Completely false	Not sure if it's real or not	Not sure if it's real or not	5	1	1	1	1	5	1	3	3
2023-04-24 11:38:40	Real, only processed	Real, only processed	False, but convincing	Real, only processed	Real, only processed	Real, only processed	Not sure if it's real or not	Real, only processed	Real, only processed	5	5	2	5	5	5	3	5	5
2023-04-24 11:39:20	Real, only processed	Not sure if it's real or not	Real, only processed	Real, only processed	Real, only processed	Real, only processed	False, but convincing	Real, only processed	Real, only processed	5	3	5	5	5	5	2	5	5
2023-04-24 11:39:28	Real, only processed	Real, but heavily modified	Not sure if it's real or not	False, but convincing	Real, only processed	Not sure if it's real or not	Real, only processed	Completely false	Real, but heavily modified	5	4	3	2	5	3	5	1	4
2023-04-24 11:42:06	Real, only processed	Real, only processed	Real, only processed	False, but convincing	Completely false	Real, only processed	Completely false	Not sure if it's real or not	Not sure if it's real or not	5	5	5	2	1	5	1	3	3
2023-04-24 11:42:12	Real, only processed	False, but convincing	Not sure if it's real or not	Real, only processed	Real, only processed	Real, but heavily modified	False, but convincing	Real, only processed	Real, only processed	5	2	3	5	5	4	2	5	5
2023-04-24 11:42:31	Real, only processed	Real, only processed	Real, only processed	Real, only processed	Real, only processed	Real, only processed	Completely false	Real, only processed	Real, only processed	5	5	5	5	5	5	1	5	5
2023-04-24 11:43:42	Not sure if it's real or not	False, but convincing	Real, only processed	Not sure if it's real or not	Real, but heavily modified	Not sure if it's real or not	Not sure if it's real or not	Not sure if it's real or not	False, but convincing	3	2	5	3	4	3	3	3	2
2023-04-24 11:44:55	Not sure if it's real or not	Real, only processed	Real, but heavily modified	Real, only processed	Not sure if it's real or not	Real, only processed	Real, only processed	Real, only processed	Real, only processed	3	5	4	5	3	5	5	5	5
2023-04-24 11:44:58	Real, only processed	Real, but heavily modified	Real, only processed	Real, only processed	False, but convincing	Real, only processed	Completely false	Real, only processed	Real, only processed	5	4	5	5	2	5	1	5	5
2023-04-24 11:46:35	Not sure if it's real or not	Real, but heavily modified	Not sure if it's real or not	Real, only processed	Not sure if it's real or not	Real, only processed	Real, only processed	Real, only processed	False, but convincing	3	4	3	5	3	5	5	5	2
2023-04-24 11:46:47	Real, only processed	False, but convincing	Not sure if it's real or not	Completely false	Not sure if it's real or not	Real, only processed	False, but convincing	Not sure if it's real or not	Completely false	5	2	3	1	3	5	2	3	1
2023-04-24 11:46:57	Real, only processed	Completely false	Real, but heavily modified	Real, but heavily modified	False, but convincing	Real, only processed	False, but convincing	Completely false	Real, but heavily modified	5	1	4	4	2	5	2	1	4
2023-04-24 11:49:02	Real, only processed	False, but convincing	Real, only processed	Not sure if it's real or not	Real, only processed	Not sure if it's real or not	False, but convincing	Real, only processed	Real, only processed	5	2	5	3	5	3	2	5	5
2023-04-24 11:50:20	Real, only processed	False, but convincing	Real, only processed	Real, but heavily modified	Real, only processed	Real, only processed	Not sure if it's real or not	False, but convincing	Real, only processed	5	2	5	4	5	5	3	2	5
2023-04-24 11:56:22	Real, only processed	Real, only processed	Real, only processed	Real, only processed	Real, only processed	Real, only processed	Real, only processed	Real, only processed	Real, only processed	5	5	5	5	5	5	5	5	5
2023-04-24 11:57:20	Real, only processed	Real, only processed	Real, only processed	Not sure if it's real or not	Real, only processed	Real, only processed	Real, only processed	False, but convincing	False, but convincing	5	5	5	3	5	5	5	2	2
2023-04-24 11:59:10	Real, only processed	Real, only processed	Real, only processed	Real, only processed	Real, only processed	Real, only processed	Real, only processed	Real, only processed	Real, only processed	5	5	5	5	5	5	5	5	5
2023-04-24 12:00:36	Real, only processed	False, but convincing	False, but convincing	Real, only processed	Real, only processed	Real, only processed	Completely false	Real, only processed	Real, only processed	5	2	2	5	5	5	1	5	5
2023-04-24 12:01:10	Real, only processed	Real, only processed	Real, only processed	Real, only processed	False, but convincing	Real, only processed	False, but convincing	Completely false	Real, only processed	5	5	5	5	2	5	2	1	5
2023-04-24 12:02:01	Not sure if it's real or not	Real, only processed	Real, but heavily modified	Real, but heavily modified	Real, only processed	Real, but heavily modified	Not sure if it's real or not	Real, only processed	Real, only processed	3	5	4	4	5	4	3	5	5
2023-04-24 12:02:25	Real, but heavily modified	Real, only processed	Real, only processed	Real, only processed	Real, only processed	Real, only processed	Real, only processed	Real, only processed	False, but convincing	4	5	5	5	5	5	5	5	2
2023-04-24 12:03:03	Real, but heavily modified	Real, only processed	False, but convincing	Real, only processed	Not sure if it's real or not	Real, only processed	Real, only processed	Completely false	Completely false	4	5	2	5	3	5	5	1	1
2023-04-24 12:03:12	Real, only processed	False, but convincing	False, but convincing	Real, only processed	False, but convincing	Real, only processed	Real, only processed	Real, only processed	Real, only processed	5	2	2	5	2	5	5	5	5
2023-04-24 12:03:38	Real, only processed	Real, but heavily modified	Real, but heavily modified	Real, but heavily modified	Not sure if it's real or not	Not sure if it's real or not	Not sure if it's real or not	Not sure if it's real or not	Not sure if it's real or not	5	4	4	4	3	3	3	3	3
2023-04-24 12:09:04	Real, only processed	False, but convincing	Real, but heavily modified	Real, only processed	Completely false	Not sure if it's real or not	False, but convincing	Real, only processed	Real, only processed	5	2	4	5	1	3	2	5	5
2023-04-24 12:11:17	Real, only processed	False, but convincing	Real, only processed	False, but convincing	False, but convincing	Real, only processed	Not sure if it's real or not	False, but convincing	Real, only processed	5	2	5	2	2	5	3	2	5
2023-04-24 12:22:00	Not sure if it's real or not	False, but convincing	Real, but heavily modified	Real, but heavily modified	Real, only processed	Real, only processed	Not sure if it's real or not	Real, only processed	Real, only processed	3	2	4	4	5	5	3	5	5
2023-04-24 12:25:47	Real, only processed	False, but convincing	Real, only processed	Real, only processed	Real, only processed	Real, only processed	False, but convincing	Real, only processed	Real, only processed	5	2	5	5	5	5	2	5	5
2023-04-24 12:29:36	Real, but heavily modified	Not sure if it's real or not	False, but convincing	Real, only processed	False, but convincing	Real, only processed	False, but convincing	Completely false	False, but convincing	4	3	2	5	2	5	2	1	2
2023-04-24 12:29:50	Real, only processed	Real, only processed	Real, only processed	Real, only processed	Real, only processed	Real, only processed	False, but convincing	False, but convincing	Real, only processed	5	5	5	5	5	5	2	2	5
2023-04-24 12:32:00	Real, only processed	Real, only processed	False, but convincing	Not sure if it's real or not	Completely false	Real, only processed	Real, only processed	Completely false	Real, only processed	5	5	2	3	1	5	5	1	5
2023-04-24 12:33:00	False, but convincing	Not sure if it's real or not	Real, but heavily modified	Real, only processed	Real, only processed	False, but convincing	Not sure if it's real or not	Real, only processed	Not sure if it's real or not	2	3	4	5	5	2	3	5	3
2023-04-24 12:34:28	Real, only processed	False, but convincing	Real, but heavily modified	Real, only processed	Not sure if it's real or not	Real, only processed	Completely false	Real, only processed	Real, only processed	5	2	4	5	3	5	1	5	5
2023-04-24 12:38:07	Real, only processed	Real, but heavily modified	Real, only processed	Real, only processed	Real, only processed	Real, only processed	Real, but heavily modified	Completely false	Real, only processed	5	4	5	5	5	5	4	1	5
2023-04-24 12:39:04	Real, only processed	Real, but heavily modified	Completely false	Real, only processed	Not sure if it's real or not	Real, only processed	Completely false	False, but convincing	Real, only processed	5	4	1	5	3	5	1	2	5
2023-04-24 12:40:12	Real, only processed	False, but convincing	Real, but heavily modified	Real, only processed	Real, only processed	Not sure if it's real or not	Real, but heavily modified	Not sure if it's real or not	Not sure if it's real or not	5	2	4	5	5	3	4	3	3
2023-04-24 12:40:48	Real, only processed	Real, but heavily modified	Real, only processed	Real, but heavily modified	Real, only processed	Real, only processed	Real, only processed	Real, but heavily modified	Real, only processed	5	4	5	4	5	5	5	4	5
2023-04-24 12:40:57	Real, only processed	Real, only processed	Real, but heavily modified	Real, but heavily modified	Completely false	Real, but heavily modified	Real, but heavily modified	False, but convincing	Not sure if it's real or not	5	5	4	4	1	4	4	2	3
2023-04-24 12:41:22	Real, only processed	Real, but heavily modified	Real, only processed	Real, only processed	Real, but heavily modified	Real, only processed	Completely false	Real, only processed	False, but convincing	5	4	5	5	4	5	1	5	2
2023-04-24 12:43:02	Real, but heavily modified	Real, but heavily modified	Real, but heavily modified	Real, but heavily modified	Real, but heavily modified	Real, but heavily modified	Real, but heavily modified	Real, but heavily modified	Real, but heavily modified	4	4	4	4	4	4	4	4	4
2023-04-24 12:43:23	Real, only processed	Real, only processed	Real, but heavily modified	False, but convincing	False, but convincing	Real, only processed	Completely false	Real, only processed	Real, only processed	5	5	4	2	2	5	1	5	5
2023-04-24 12:43:53	Real, only processed	Real, but heavily modified	Real, only processed	Real, only processed	Real, only processed	Real, only processed	Real, but heavily modified	Real, only processed	Real, only processed	5	4	5	5	5	5	4	5	5
2023-04-24 12:45:08	Real, but heavily modified	Completely false	Real, only processed	Real, but heavily modified	Real, but heavily modified	Real, only processed	Real, only processed	Real, only processed	Not sure if it's real or not	4	1	5	4	4	5	5	5	3
2023-04-24 12:45:20	Real, only processed	False, but convincing	Real, only processed	Real, only processed	Real, only processed	Real, only processed	Completely false	Real, only processed	Real, only processed	5	2	5	5	5	5	1	5	5
2023-04-24 12:46:24	Real, only processed	Not sure if it's real or not	Real, only processed	Real, only processed	Not sure if it's real or not	Real, only processed	Real, only processed	Not sure if it's real or not	Real, only processed	5	3	5	5	3	5	5	3	5
2023-04-24 12:47:22	Real, but heavily modified	False, but convincing	Real, but heavily modified	Real, but heavily modified	Real, only processed	Real, only processed	Completely false	Real, only processed	Real, only processed	4	2	4	4	5	5	1	5	5
2023-04-24 12:48:15	Real, only processed	Real, but heavily modified	Real, only processed	Real, only processed	False, but convincing	Real, only processed	False, but convincing	False, but convincing	Real, but heavily modified	5	4	5	5	2	5	2	2	4
2023-04-24 12:48:18	Not sure if it's real or not	Real, only processed	Real, only processed	Real, only processed	Real, only processed	Real, only processed	Real, only processed	Not sure if it's real or not	Not sure if it's real or not	3	5	5	5	5	5	5	3	3
2023-04-24 12:49:36	Real, only processed	Real, but heavily modified	Completely false	Completely false	Not sure if it's real or not	Real, only processed	Real, but heavily modified	Real, but heavily modified	Real, but heavily modified	5	4	1	1	3	5	4	4	4
2023-04-24 12:50:32	Real, but heavily modified	Real, only processed	Real, but heavily modified	Real, only processed	Real, only processed	Real, only processed	Real, but heavily modified	Real, only processed	Real, only processed	4	5	4	5	5	5	4	5	5
2023-04-24 12:51:35	Not sure if it's real or not	Completely false	Real, only processed	Real, only processed	Real, only processed	Real, only processed	Real, only processed	Real, only processed	Real, only processed	3	1	5	5	5	5	5	5	5
2023-04-24 12:52:11	Real, only processed	False, but convincing	False, but convincing	Real, but heavily modified	Not sure if it's real or not	Real, only processed	Completely false	Completely false	Real, only processed	5	2	2	4	3	5	1	1	5
2023-04-24 12:52:20	Real, but heavily modified	Completely false	Real, only processed	Real, only processed	Real, only processed	Real, only processed	Real, only processed	Real, but heavily modified	Real, only processed	4	1	5	5	5	5	5	4	5
2023-04-24 12:54:03	False, but convincing	Completely false	Real, but heavily modified	Completely false	False, but convincing	Real, but heavily modified	Completely false	Completely false	Not sure if it's real or not	2	1	4	1	2	4	1	1	3
2023-04-24 12:54:56	Real, but heavily modified	False, but convincing	Real, but heavily modified	Real, only processed	Real, only processed	Real, only processed	False, but convincing	False, but convincing	Real, but heavily modified	4	2	4	5	5	5	2	2	4
2023-04-24 12:55:17	Real, only processed	Real, only processed	Real, only processed	Real, only processed	Real, only processed	Real, only processed	Real, only processed	Real, only processed	Real, only processed	5	5	5	5	5	5	5	5	5
2023-04-24 12:55:34	Real, only processed	False, but convincing	Real, only processed	Real, only processed	Not sure if it's real or not	Real, only processed	Not sure if it's real or not	Real, only processed	Real, only processed	5	2	5	5	3	5	3	5	5
2023-04-24 12:56:18	Real, only processed	Real, but heavily modified	Real, only processed	Real, only processed	Real, only processed	Real, only processed	Real, but heavily modified	Real, only processed	Real, only processed	5	4	5	5	5	5	4	5	5
2023-04-24 12:56:43	Real, only processed	False, but convincing	Real, but heavily modified	False, but convincing	False, but convincing	Real, only processed	False, but convincing	Not sure if it's real or not	Real, but heavily modified	5	2	4	2	2	5	2	3	4
2023-04-24 12:56:55	Real, only processed	False, but convincing	Real, only processed	Real, only processed	Not sure if it's real or not	Real, only processed	False, but convincing	Real, only processed	Real, only processed	5	2	5	5	3	5	2	5	5
2023-04-24 13:00:38	Real, only processed	False, but convincing	False, but convincing	Real, only processed	Real, only processed	Real, only processed	Real, but heavily modified	False, but convincing	Real, only processed	5	2	2	5	5	5	4	2	5
2023-04-24 13:00:57	Real, only processed	Real, but heavily modified	Real, only processed	Not sure if it's real or not	Real, but heavily modified	Real, only processed	Completely false	Real, only processed	Real, only processed	5	4	5	3	4	5	1	5	5
2023-04-24 13:02:12	Real, only processed	Real, only processed	Real, only processed	Real, only processed	Real, only processed	Real, only processed	Real, only processed	Real, only processed	Real, only processed	5	5	5	5	5	5	5	5	5
2023-04-24 13:02:34	False, but convincing	False, but convincing	False, but convincing	False, but convincing	False, but convincing	False, but convincing	False, but convincing	False, but convincing	False, but convincing	2	2	2	2	2	2	2	2	2
2023-04-24 13:02:42	Real, only processed	False, but convincing	False, but convincing	False, but convincing	Real, only processed	Real, only processed	Not sure if it's real or not	Completely false	Not sure if it's real or not	5	2	2	2	5	5	3	1	3
2023-04-24 13:03:51	Real, only processed	False, but convincing	Real, only processed	Real, only processed	Real, only processed	Real, only processed	Real, but heavily modified	Real, only processed	Real, but heavily modified	5	2	5	5	5	5	4	5	4
2023-04-24 13:04:02	Not sure if it's real or not	False, but convincing	Real, only processed	Real, only processed	Real, only processed	Real, only processed	Real, only processed	Real, only processed	Real, only processed	3	2	5	5	5	5	5	5	5
2023-04-24 13:04:15	Real, only processed	Completely false	False, but convincing	Completely false	Completely false	Not sure if it's real or not	Completely false	Completely false	Completely false	5	1	2	1	1	3	1	1	1
2023-04-24 13:04:52	Not sure if it's real or not	False, but convincing	Real, only processed	Real, but heavily modified	Not sure if it's real or not	Real, only processed	Completely false	Real, but heavily modified	Real, but heavily modified	3	2	5	4	3	5	1	4	4
2023-04-24 13:06:13	Real, only processed	False, but convincing	Real, only processed	Real, but heavily modified	False, but convincing	Real, only processed	False, but convincing	Real, only processed	Real, only processed	5	2	5	4	2	5	2	5	5
2023-04-24 13:06:54	Real, only processed	Real, but heavily modified	Not sure if it's real or not	Real, but heavily modified	Real, only processed	Real, only processed	Real, only processed	False, but convincing	Completely false	5	4	3	4	5	5	5	2	1
2023-04-24 13:07:24	Real, only processed	Real, only processed	Real, only processed	Real, only processed	Not sure if it's real or not	Real, only processed	Real, only processed	Not sure if it's real or not	Real, only processed	5	5	5	5	3	5	5	3	5
2023-04-24 13:07:27	Real, only processed	False, but convincing	Real, only processed	Real, only processed	Real, only processed	Real, only processed	False, but convincing	Real, only processed	Real, only processed	5	2	5	5	5	5	2	5	5
2023-04-24 13:08:06	Not sure if it's real or not	Not sure if it's real or not	Not sure if it's real or not	Not sure if it's real or not	Not sure if it's real or not	Not sure if it's real or not	Not sure if it's real or not	Not sure if it's real or not	Not sure if it's real or not	3	3	3	3	3	3	3	3	3
2023-04-24 13:09:50	Real, only processed	Real, only processed	Real, only processed	Real, only processed	Not sure if it's real or not	Not sure if it's real or not	Real, only processed	Not sure if it's real or not	Real, only processed	5	5	5	5	3	3	5	3	5
2023-04-24 13:10:58	Not sure if it's real or not	Real, only processed	Real, only processed	Not sure if it's real or not	Real, only processed	Real, only processed	Not sure if it's real or not	Not sure if it's real or not	False, but convincing	3	5	5	3	5	5	3	3	2
2023-04-24 13:11:05	Real, only processed	Real, only processed	Real, only processed	Real, only processed	Real, only processed	Real, only processed	Real, only processed	Real, only processed	Real, only processed	5	5	5	5	5	5	5	5	5
2023-04-24 13:11:24	Real, only processed	Real, but heavily modified	Real, only processed	Real, only processed	Not sure if it's real or not	Real, only processed	False, but convincing	False, but convincing	False, but convincing	5	4	5	5	3	5	2	2	2
2023-04-24 13:11:33	Real, only processed	False, but convincing	False, but convincing	Real, only processed	Real, only processed	Real, only processed	False, but convincing	Real, but heavily modified	Real, but heavily modified	5	2	2	5	5	5	2	4	4
2023-04-24 13:11:45	Real, only processed	Real, only processed	Real, only processed	Real, only processed	Real, only processed	Real, only processed	Not sure if it's real or not	Real, only processed	Real, only processed	5	5	5	5	5	5	3	5	5
2023-04-24 13:11:46	Real, only processed	Completely false	Real, only processed	Real, but heavily modified	Real, only processed	Real, only processed	False, but convincing	False, but convincing	Not sure if it's real or not	5	1	5	4	5	5	2	2	3
2023-04-24 13:11:53	False, but convincing	Real, only processed	Real, only processed	Real, only processed	Real, only processed	Real, only processed	False, but convincing	Real, only processed	Real, only processed	2	5	5	5	5	5	2	5	5
2023-04-24 13:12:30	Not sure if it's real or not	False, but convincing	Real, but heavily modified	Not sure if it's real or not	Real, but heavily modified	Real, only processed	Real, only processed	Real, only processed	Not sure if it's real or not	3	2	4	3	4	5	5	5	3
2023-04-24 13:14:20	Real, only processed	Completely false	Real, only processed	Real, only processed	Real, only processed	Real, only processed	Completely false	Real, only processed	Real, only processed	5	1	5	5	5	5	1	5	5
2023-04-24 13:15:00	Not sure if it's real or not	Real, only processed	Real, only processed	Not sure if it's real or not	Not sure if it's real or not	Real, only processed	Real, only processed	Not sure if it's real or not	Real, only processed	3	5	5	3	3	5	5	3	5
2023-04-24 13:15:20	Real, but heavily modified	Real, only processed	Real, only processed	Real, only processed	Not sure if it's real or not	Real, only processed	Real, only processed	Not sure if it's real or not	Real, only processed	4	5	5	5	3	5	5	3	5
2023-04-24 13:16:17	Not sure if it's real or not	Completely false	Completely false	False, but convincing	Real, but heavily modified	Real, only processed	Not sure if it's real or not	Real, only processed	Real, but heavily modified	3	1	1	2	4	5	3	5	4
2023-04-24 13:18:00	Not sure if it's real or not	Real, but heavily modified	Real, but heavily modified	Real, but heavily modified	Not sure if it's real or not	Not sure if it's real or not	Real, only processed	Real, only processed	Real, but heavily modified	3	4	4	4	3	3	5	5	4
2023-04-24 13:18:06	Real, but heavily modified	Completely false	False, but convincing	Real, only processed	False, but convincing	Real, only processed	Completely false	Completely false	Not sure if it's real or not	4	1	2	5	2	5	1	1	3
2023-04-24 13:19:08	Real, only processed	Real, but heavily modified	Real, but heavily modified	Real, but heavily modified	Real, only processed	Real, only processed	Real, but heavily modified	Real, only processed	Real, only processed	5	4	4	4	5	5	4	5	5
2023-04-24 13:19:20	Not sure if it's real or not	False, but convincing	Real, only processed	Real, only processed	Real, only processed	Real, only processed	False, but convincing	Real, only processed	Not sure if it's real or not	3	2	5	5	5	5	2	5	3
2023-04-24 13:19:29	Real, only processed	Not sure if it's real or not	Real, but heavily modified	Real, only processed	Real, only processed	Real, only processed	Real, but heavily modified	Real, only processed	Real, only processed	5	3	4	5	5	5	4	5	5
2023-04-24 13:20:31	Real, only processed	False, but convincing	Not sure if it's real or not	Real, only processed	Real, only processed	Real, only processed	False, but convincing	Real, only processed	Real, only processed	5	2	3	5	5	5	2	5	5
2023-04-24 13:20:33	Real, only processed	Real, only processed	False, but convincing	Real, only processed	False, but convincing	Not sure if it's real or not	Completely false	Completely false	Real, but heavily modified	5	5	2	5	2	3	1	1	4
2023-04-24 13:22:37	Real, only processed	Real, only processed	Real, only processed	Real, only processed	Real, but heavily modified	Real, only processed	Real, only processed	False, but convincing	Real, only processed	5	5	5	5	4	5	5	2	5
2023-04-24 13:22:51	Not sure if it's real or not	Real, only processed	Real, but heavily modified	Real, only processed	Real, only processed	Real, only processed	False, but convincing	Real, but heavily modified	Not sure if it's real or not	3	5	4	5	5	5	2	4	3
2023-04-24 13:23:05	Real, only processed	Real, but heavily modified	Real, only processed	Real, but heavily modified	Real, but heavily modified	Real, only processed	Real, but heavily modified	Real, only processed	Real, only processed	5	4	5	4	4	5	4	5	5
2023-04-24 13:26:39	Not sure if it's real or not	Real, but heavily modified	Real, only processed	Real, only processed	Real, only processed	Real, only processed	False, but convincing	Completely false	Real, only processed	3	4	5	5	5	5	2	1	5
2023-04-24 13:26:45	Real, only processed	Real, only processed	False, but convincing	Not sure if it's real or not	Real, only processed	Real, only processed	Not sure if it's real or not	Real, only processed	Real, only processed	5	5	2	3	5	5	3	5	5
2023-04-24 13:27:03	False, but convincing	False, but convincing	Real, but heavily modified	Real, only processed	False, but convincing	Real, only processed	False, but convincing	Completely false	Real, only processed	2	2	4	5	2	5	2	1	5
2023-04-24 13:28:09	Real, only processed	Real, only processed	Real, only processed	Real, only processed	Real, only processed	Real, only processed	Real, only processed	Real, only processed	Real, only processed	5	5	5	5	5	5	5	5	5
2023-04-24 13:28:25	Real, but heavily modified	False, but convincing	Real, only processed	Real, only processed	False, but convincing	Real, only processed	Completely false	Completely false	Real, only processed	4	2	5	5	2	5	1	1	5
2023-04-24 13:29:12	Real, only processed	False, but convincing	Real, only processed	Completely false	False, but convincing	Real, only processed	Completely false	False, but convincing	Real, but heavily modified	5	2	5	1	2	5	1	2	4
2023-04-24 13:29:27	Real, only processed	Real, only processed	Real, only processed	Real, only processed	Real, only processed	Real, only processed	Real, but heavily modified	Real, only processed	Real, only processed	5	5	5	5	5	5	4	5	5
2023-04-24 13:29:42	Real, only processed	Completely false	Real, only processed	Not sure if it's real or not	Real, only processed	Real, only processed	Completely false	Real, only processed	Not sure if it's real or not	5	1	5	3	5	5	1	5	3
2023-04-24 13:30:18	Not sure if it's real or not	Real, but heavily modified	Real, only processed	Real, only processed	False, but convincing	Not sure if it's real or not	Real, only processed	Real, but heavily modified	Real, but heavily modified	3	4	5	5	2	3	5	4	4
2023-04-24 13:31:07	Not sure if it's real or not	Real, only processed	Real, only processed	Real, but heavily modified	Real, only processed	Real, but heavily modified	Real, but heavily modified	Real, but heavily modified	Real, only processed	3	5	5	4	5	4	4	4	5
2023-04-24 13:31:13	Real, only processed	Real, only processed	Real, only processed	Real, only processed	Completely false	Real, but heavily modified	False, but convincing	Real, but heavily modified	Real, only processed	5	5	5	5	1	4	2	4	5
2023-04-24 13:31:28	Real, only processed	Not sure if it's real or not	Real, only processed	Real, only processed	Not sure if it's real or not	Real, only processed	Not sure if it's real or not	Real, only processed	Real, only processed	5	3	5	5	3	5	3	5	5
2023-04-24 13:32:17	Real, but heavily modified	Real, only processed	Real, only processed	Real, but heavily modified	Not sure if it's real or not	False, but convincing	Real, only processed	Real, only processed	Real, only processed	4	5	5	4	3	2	5	5	5
2023-04-24 13:32:33	Real, only processed	Completely false	Real, but heavily modified	Real, only processed	Real, only processed	Real, only processed	Completely false	False, but convincing	Completely false	5	1	4	5	5	5	1	2	1
2023-04-24 13:32:46	Real, but heavily modified	Completely false	Real, only processed	Real, but heavily modified	Real, only processed	Real, only processed	Real, only processed	Not sure if it's real or not	Real, only processed	4	1	5	4	5	5	5	3	5
2023-04-24 13:33:13	Real, only processed	Real, only processed	Not sure if it's real or not	Real, only processed	Real, only processed	Real, only processed	Real, only processed	Real, only processed	Real, only processed	5	5	3	5	5	5	5	5	5
2023-04-24 13:33:18	Real, only processed	Real, only processed	Real, only processed	Real, only processed	Real, only processed	Real, only processed	Real, only processed	Real, only processed	Real, only processed	5	5	5	5	5	5	5	5	5
2023-04-24 13:33:23	Real, only processed	Real, but heavily modified	Real, only processed	Completely false	Real, but heavily modified	Real, only processed	Not sure if it's real or not	False, but convincing	Completely false	5	4	5	1	4	5	3	2	1
2023-04-24 13:33:36	Real, only processed	Real, but heavily modified	Not sure if it's real or not	Real, only processed	Not sure if it's real or not	Real, only processed	Real, but heavily modified	Real, only processed	Real, only processed	5	4	3	5	3	5	4	5	5
2023-04-24 13:34:31	Real, only processed	Real, only processed	Real, but heavily modified	Real, only processed	False, but convincing	Real, only processed	False, but convincing	Real, only processed	Real, only processed	5	5	4	5	2	5	2	5	5
2023-04-24 13:34:56	Real, but heavily modified	Not sure if it's real or not	Real, but heavily modified	Real, only processed	Real, only processed	Real, but heavily modified	Not sure if it's real or not	Not sure if it's real or not	Real, but heavily modified	4	3	4	5	5	4	3	3	4
2023-04-24 13:34:56	Real, only processed	Completely false	Real, but heavily modified	False, but convincing	False, but convincing	Real, but heavily modified	False, but convincing	Not sure if it's real or not	Real, only processed	5	1	4	2	2	4	2	3	5
2023-04-24 13:35:12	Real, but heavily modified	False, but convincing	Not sure if it's real or not	False, but convincing	Not sure if it's real or not	Not sure if it's real or not	Completely false	False, but convincing	Real, but heavily modified	4	2	3	2	3	3	1	2	4
2023-04-24 13:35:52	Not sure if it's real or not	Real, only processed	Real, only processed	Real, only processed	Real, only processed	Real, only processed	Real, only processed	Real, only processed	Real, only processed	3	5	5	5	5	5	5	5	5
2023-04-24 13:35:56	Real, only processed	Completely false	Real, only processed	Not sure if it's real or not	Real, only processed	Real, only processed	Completely false	Not sure if it's real or not	Real, only processed	5	1	5	3	5	5	1	3	5
2023-04-24 13:38:36	Real, only processed	False, but convincing	Not sure if it's real or not	Real, but heavily modified	False, but convincing	Real, only processed	Completely false	False, but convincing	Real, but heavily modified	5	2	3	4	2	5	1	2	4
2023-04-24 13:38:41	Real, only processed	Real, only processed	Not sure if it's real or not	Not sure if it's real or not	Real, only processed	Real, only processed	Completely false	Completely false	Real, only processed	5	5	3	3	5	5	1	1	5
2023-04-24 13:39:37	Real, but heavily modified	False, but convincing	Real, only processed	Real, only processed	Real, but heavily modified	Real, only processed	Not sure if it's real or not	False, but convincing	Not sure if it's real or not	4	2	5	5	4	5	3	2	3
2023-04-24 13:40:07	Not sure if it's real or not	Real, only processed	Real, only processed	Real, only processed	Completely false	Real, only processed	False, but convincing	Not sure if it's real or not	Real, only processed	3	5	5	5	1	5	2	3	5
2023-04-24 13:40:22	Real, only processed	False, but convincing	Not sure if it's real or not	Completely false	Real, only processed	Real, only processed	Completely false	Real, but heavily modified	Real, only processed	5	2	3	1	5	5	1	4	5
2023-04-24 13:40:40	Completely false	Completely false	False, but convincing	False, but convincing	Completely false	False, but convincing	Completely false	Completely false	Completely false	1	1	2	2	1	2	1	1	1
2023-04-24 13:41:52	Real, only processed	Completely false	False, but convincing	Not sure if it's real or not	Completely false	Real, only processed	False, but convincing	Not sure if it's real or not	Real, only processed	5	1	2	3	1	5	2	3	5
2023-04-24 13:41:58	Not sure if it's real or not	Completely false	Completely false	Not sure if it's real or not	Not sure if it's real or not	Real, only processed	Completely false	Real, only processed	False, but convincing	3	1	1	3	3	5	1	5	2
2023-04-24 13:43:20	Real, only processed	Real, only processed	Real, only processed	Real, only processed	Real, only processed	Real, only processed	Real, only processed	Real, only processed	Real, only processed	5	5	5	5	5	5	5	5	5
2023-04-24 13:43:43	Completely false	False, but convincing	Real, but heavily modified	Real, but heavily modified	Real, only processed	Not sure if it's real or not	Not sure if it's real or not	Not sure if it's real or not	Real, only processed	1	2	4	4	5	3	3	3	5
2023-04-24 13:44:31	Real, only processed	Real, only processed	Real, only processed	Real, but heavily modified	Real, only processed	Real, only processed	Not sure if it's real or not	Real, only processed	Real, only processed	5	5	5	4	5	5	3	5	5
2023-04-24 13:44:55	False, but convincing	Completely false	Real, only processed	Real, only processed	Completely false	Not sure if it's real or not	Completely false	Completely false	False, but convincing	2	1	5	5	1	3	1	1	2
2023-04-24 13:45:28	Completely false	Completely false	Completely false	Not sure if it's real or not	Not sure if it's real or not	Not sure if it's real or not	Completely false	Not sure if it's real or not	Not sure if it's real or not	1	1	1	3	3	3	1	3	3
2023-04-24 13:45:46	Real, but heavily modified	Real, only processed	Real, only processed	Real, only processed	False, but convincing	Real, only processed	Completely false	Real, only processed	Real, but heavily modified	4	5	5	5	2	5	1	5	4
2023-04-24 13:46:11	Real, only processed	Completely false	Real, only processed	Not sure if it's real or not	Real, only processed	Not sure if it's real or not	Completely false	Completely false	Not sure if it's real or not	5	1	5	3	5	3	1	1	3
2023-04-24 13:46:33	False, but convincing	Completely false	Not sure if it's real or not	False, but convincing	Real, only processed	Real, only processed	Completely false	False, but convincing	Real, only processed	2	1	3	2	5	5	1	2	5
2023-04-24 13:46:43	Not sure if it's real or not	Completely false	Real, but heavily modified	Real, but heavily modified	Not sure if it's real or not	Real, only processed	False, but convincing	Real, only processed	Real, only processed	3	1	4	4	3	5	2	5	5
2023-04-24 13:47:15	Real, only processed	Completely false	Completely false	Real, only processed	Not sure if it's real or not	False, but convincing	Completely false	Completely false	Real, only processed	5	1	1	5	3	2	1	1	5
2023-04-24 13:47:25	Real, only processed	Real, but heavily modified	Real, only processed	Real, but heavily modified	Real, only processed	Real, only processed	Real, but heavily modified	Real, only processed	Real, only processed	5	4	5	4	5	5	4	5	5
2023-04-24 13:47:42	Real, but heavily modified	Real, but heavily modified	Real, only processed	Real, only processed	Real, only processed	Real, only processed	Real, only processed	Not sure if it's real or not	Real, only processed	4	4	5	5	5	5	5	3	5
2023-04-24 13:48:02	Real, only processed	False, but convincing	Real, only processed	Real, only processed	False, but convincing	Real, only processed	Completely false	False, but convincing	Real, only processed	5	2	5	5	2	5	1	2	5
2023-04-24 13:48:35	False, but convincing	False, but convincing	Not sure if it's real or not	Real, but heavily modified	Real, but heavily modified	Real, only processed	Completely false	False, but convincing	Real, but heavily modified	2	2	3	4	4	5	1	2	4
2023-04-24 13:49:33	Real, only processed	False, but convincing	Real, but heavily modified	Not sure if it's real or not	Completely false	Real, only processed	False, but convincing	Not sure if it's real or not	Real, only processed	5	2	4	3	1	5	2	3	5
2023-04-24 13:50:09	Real, only processed	False, but convincing	Real, only processed	Real, but heavily modified	Not sure if it's real or not	Real, only processed	Completely false	Not sure if it's real or not	Real, only processed	5	2	5	4	3	5	1	3	5
2023-04-24 13:50:29	Not sure if it's real or not	Completely false	Real, but heavily modified	Real, only processed	Real, only processed	Real, only processed	Completely false	False, but convincing	False, but convincing	3	1	4	5	5	5	1	2	2
2023-04-24 13:50:45	Not sure if it's real or not	False, but convincing	Real, only processed	Real, only processed	Real, only processed	Real, only processed	Completely false	False, but convincing	Real, only processed	3	2	5	5	5	5	1	2	5
2023-04-24 13:51:32	Not sure if it's real or not	Real, but heavily modified	False, but convincing	Real, but heavily modified	Real, only processed	Real, only processed	Real, but heavily modified	Completely false	Real, but heavily modified	3	4	2	4	5	5	4	1	4
2023-04-24 13:52:38	Real, only processed	Real, only processed	Real, only processed	Real, but heavily modified	Real, but heavily modified	Real, but heavily modified	Real, only processed	Real, but heavily modified	Real, but heavily modified	5	5	5	4	4	4	5	4	4
2023-04-24 13:52:54	Real, only processed	Completely false	Not sure if it's real or not	Real, only processed	Real, only processed	Real, only processed	Not sure if it's real or not	Real, only processed	Real, only processed	5	1	3	5	5	5	3	5	5
2023-04-24 13:53:13	Not sure if it's real or not	Real, but heavily modified	Real, only processed	Real, but heavily modified	Real, but heavily modified	Real, only processed	Real, only processed	Real, but heavily modified	Not sure if it's real or not	3	4	5	4	4	5	5	4	3
2023-04-24 13:56:20	Not sure if it's real or not	Completely false	Real, but heavily modified	Not sure if it's real or not	Real, only processed	Not sure if it's real or not	False, but convincing	Completely false	Real, only processed	3	1	4	3	5	3	2	1	5
2023-04-24 13:56:24	Not sure if it's real or not	Completely false	Not sure if it's real or not	Completely false	Real, but heavily modified	Real, but heavily modified	Completely false	Not sure if it's real or not	Real, but heavily modified	3	1	3	1	4	4	1	3	4
2023-04-24 13:57:37	Real, only processed	Real, only processed	Real, only processed	Real, only processed	Real, only processed	Real, only processed	Real, only processed	Real, only processed	Real, only processed	5	5	5	5	5	5	5	5	5
2023-04-24 13:58:18	Not sure if it's real or not	Not sure if it's real or not	Real, only processed	Real, only processed	Real, only processed	Real, only processed	Real, only processed	Real, only processed	Real, only processed	3	3	5	5	5	5	5	5	5
2023-04-24 13:58:21	Real, only processed	Real, only processed	Real, only processed	Real, only processed	Real, only processed	Real, only processed	Real, only processed	Real, only processed	Real, only processed	5	5	5	5	5	5	5	5	5
2023-04-24 13:59:18	Real, only processed	Real, but heavily modified	Real, only processed	Real, only processed	Not sure if it's real or not	Real, only processed	Real, only processed	Real, but heavily modified	Real, only processed	5	4	5	5	3	5	5	4	5
2023-04-24 13:59:33	Real, only processed	Completely false	Not sure if it's real or not	Real, only processed	Real, only processed	Real, but heavily modified	Real, only processed	False, but convincing	Real, only processed	5	1	3	5	5	4	5	2	5
2023-04-24 14:00:16	False, but convincing	False, but convincing	Not sure if it's real or not	Real, only processed	Real, only processed	Real, only processed	Not sure if it's real or not	Completely false	Real, only processed	2	2	3	5	5	5	3	1	5
2023-04-24 14:01:49	Not sure if it's real or not	False, but convincing	Real, only processed	Real, only processed	Real, only processed	Real, only processed	Real, only processed	Not sure if it's real or not	Not sure if it's real or not	3	2	5	5	5	5	5	3	3
2023-04-24 14:01:57	Real, only processed	Real, only processed	Real, only processed	Real, only processed	Real, only processed	Real, only processed	Real, only processed	Real, only processed	Real, only processed	5	5	5	5	5	5	5	5	5
2023-04-24 14:02:00	Real, only processed	Real, but heavily modified	Real, only processed	Real, but heavily modified	Real, only processed	Real, only processed	Real, but heavily modified	False, but convincing	Real, only processed	5	4	5	4	5	5	4	2	5
2023-04-24 14:02:51	Real, only processed	Real, but heavily modified	False, but convincing	Real, only processed	Real, only processed	Real, only processed	Completely false	Completely false	Real, only processed	5	4	2	5	5	5	1	1	5
2023-04-24 14:03:11	Real, only processed	Real, only processed	Real, only processed	Real, only processed	Real, only processed	Real, only processed	Completely false	False, but convincing	Real, only processed	5	5	5	5	5	5	1	2	5
2023-04-24 14:04:05	Real, but heavily modified	Real, only processed	Real, only processed	Real, only processed	Real, only processed	Real, only processed	Real, only processed	Real, only processed	Real, only processed	4	5	5	5	5	5	5	5	5
2023-04-24 14:05:01	Real, only processed	Real, but heavily modified	False, but convincing	Real, only processed	Real, but heavily modified	Real, only processed	Not sure if it's real or not	False, but convincing	Real, only processed	5	4	2	5	4	5	3	2	5
2023-04-24 14:06:22	Real, only processed	Real, but heavily modified	Completely false	Real, only processed	False, but convincing	Real, only processed	False, but convincing	Real, but heavily modified	Real, only processed	5	4	1	5	2	5	2	4	5
2023-04-24 14:07:42	Real, only processed	False, but convincing	Real, only processed	Real, only processed	Real, only processed	Real, but heavily modified	Real, but heavily modified	Real, only processed	Real, only processed	5	2	5	5	5	4	4	5	5
2023-04-24 14:08:55	False, but convincing	Completely false	Real, but heavily modified	Real, but heavily modified	False, but convincing	Real, only processed	Completely false	Completely false	Real, only processed	2	1	4	4	2	5	1	1	5
2023-04-24 14:08:56	Real, only processed	False, but convincing	Real, only processed	Real, only processed	Real, only processed	Real, only processed	False, but convincing	Real, only processed	Real, only processed	5	2	5	5	5	5	2	5	5
2023-04-24 14:09:08	Real, only processed	Not sure if it's real or not	Real, only processed	Real, only processed	Real, only processed	Real, only processed	Real, only processed	Not sure if it's real or not	Not sure if it's real or not	5	3	5	5	5	5	5	3	3
2023-04-24 14:09:11	Real, only processed	Completely false	Real, only processed	Real, only processed	Completely false	False, but convincing	Completely false	Completely false	Real, only processed	5	1	5	5	1	2	1	1	5
2023-04-24 14:10:38	Not sure if it's real or not	False, but convincing	Not sure if it's real or not	Real, only processed	Real, only processed	Real, only processed	Completely false	False, but convincing	Real, but heavily modified	3	2	3	5	5	5	1	2	4
2023-04-24 14:10:45	Real, only processed	Real, only processed	Real, only processed	Not sure if it's real or not	False, but convincing	Real, only processed	Real, only processed	Not sure if it's real or not	Real, only processed	5	5	5	3	2	5	5	3	5
2023-04-24 14:10:50	Real, but heavily modified	Completely false	Real, but heavily modified	Completely false	Real, only processed	Real, only processed	False, but convincing	Completely false	Not sure if it's real or not	4	1	4	1	5	5	2	1	3
2023-04-24 14:11:55	Real, only processed	False, but convincing	False, but convincing	Real, only processed	False, but convincing	Real, only processed	Completely false	Real, only processed	Real, only processed	5	2	2	5	2	5	1	5	5
2023-04-24 14:12:13	Not sure if it's real or not	Real, only processed	Real, only processed	Real, but heavily modified	Not sure if it's real or not	Real, only processed	Completely false	Real, only processed	Not sure if it's real or not	3	5	5	4	3	5	1	5	3
2023-04-24 14:16:22	Real, only processed	Completely false	Not sure if it's real or not	Real, only processed	False, but convincing	Real, only processed	Not sure if it's real or not	Not sure if it's real or not	Real, only processed	5	1	3	5	2	5	3	3	5
2023-04-24 14:16:48	Not sure if it's real or not	Real, but heavily modified	Real, only processed	Real, only processed	Real, only processed	Real, only processed	Real, but heavily modified	Real, only processed	Not sure if it's real or not	3	4	5	5	5	5	4	5	3
2023-04-24 14:17:14	Real, only processed	False, but convincing	Real, but heavily modified	Real, only processed	Not sure if it's real or not	Real, only processed	Completely false	False, but convincing	Not sure if it's real or not	5	2	4	5	3	5	1	2	3
2023-04-24 14:17:54	Real, only processed	Real, but heavily modified	Completely false	Real, only processed	Real, only processed	Real, only processed	Completely false	Not sure if it's real or not	Real, only processed	5	4	1	5	5	5	1	3	5
2023-04-24 14:18:02	Real, but heavily modified	False, but convincing	Real, but heavily modified	False, but convincing	Real, only processed	Real, only processed	Completely false	Real, only processed	Completely false	4	2	4	2	5	5	1	5	1
2023-04-24 14:18:38	Not sure if it's real or not	Real, but heavily modified	Real, only processed	Real, but heavily modified	Real, but heavily modified	Real, only processed	Real, only processed	Real, only processed	Real, only processed	3	4	5	4	4	5	5	5	5
2023-04-24 14:18:53	Not sure if it's real or not	False, but convincing	Real, only processed	Real, only processed	Real, only processed	Real, only processed	False, but convincing	Real, only processed	Real, only processed	3	2	5	5	5	5	2	5	5
2023-04-24 14:18:55	Real, only processed	False, but convincing	Not sure if it's real or not	Real, but heavily modified	Real, only processed	Real, only processed	Real, only processed	Real, only processed	Real, only processed	5	2	3	4	5	5	5	5	5
2023-04-24 14:19:02	Not sure if it's real or not	Real, only processed	Real, only processed	Not sure if it's real or not	Real, only processed	Real, only processed	Real, only processed	False, but convincing	Not sure if it's real or not	3	5	5	3	5	5	5	2	3
2023-04-24 14:19:33	Real, only processed	Real, only processed	Real, only processed	Real, but heavily modified	Not sure if it's real or not	Real, only processed	Not sure if it's real or not	Real, only processed	Real, only processed	5	5	5	4	3	5	3	5	5
2023-04-24 14:21:14	Real, only processed	Real, only processed	Real, only processed	Real, only processed	Real, only processed	Real, only processed	Real, only processed	Real, only processed	Real, only processed	5	5	5	5	5	5	5	5	5
2023-04-24 14:21:26	False, but convincing	Real, only processed	Real, only processed	Real, only processed	Not sure if it's real or not	Real, only processed	False, but convincing	Completely false	Real, only processed	2	5	5	5	3	5	2	1	5
2023-04-24 14:23:54	Real, but heavily modified	Completely false	Not sure if it's real or not	Real, only processed	False, but convincing	Real, only processed	Real, only processed	Completely false	Real, only processed	4	1	3	5	2	5	5	1	5
2023-04-24 14:24:21	Real, only processed	Real, only processed	Real, only processed	Real, only processed	Real, only processed	Real, but heavily modified	Not sure if it's real or not	Real, but heavily modified	False, but convincing	5	5	5	5	5	4	3	4	2
2023-04-24 14:24:31	Real, only processed	Real, only processed	Real, only processed	Real, only processed	False, but convincing	Real, only processed	Completely false	Not sure if it's real or not	Real, but heavily modified	5	5	5	5	2	5	1	3	4
2023-04-24 14:25:29	Real, only processed	Real, only processed	False, but convincing	Real, only processed	Real, but heavily modified	False, but convincing	Real, but heavily modified	Real, only processed	Real, but heavily modified	5	5	2	5	4	2	4	5	4
2023-04-24 14:27:20	Real, but heavily modified	Completely false	Real, only processed	Real, only processed	Not sure if it's real or not	Real, only processed	Completely false	Not sure if it's real or not	Real, only processed	4	1	5	5	3	5	1	3	5
2023-04-24 14:27:27	False, but convincing	Not sure if it's real or not	Completely false	Completely false	Real, only processed	Real, only processed	Completely false	Real, but heavily modified	Real, only processed	2	3	1	1	5	5	1	4	5
2023-04-24 14:30:19	False, but convincing	Completely false	Completely false	Completely false	Not sure if it's real or not	False, but convincing	Not sure if it's real or not	Not sure if it's real or not	Real, but heavily modified	2	1	1	1	3	2	3	3	4
2023-04-24 14:30:47	Real, only processed	Real, but heavily modified	Real, only processed	Real, only processed	Real, only processed	Real, only processed	Completely false	Real, only processed	Real, only processed	5	4	5	5	5	5	1	5	5
2023-04-24 14:30:56	Real, but heavily modified	Real, only processed	Real, only processed	Not sure if it's real or not	Real, only processed	Real, only processed	Real, only processed	Real, only processed	Real, only processed	4	5	5	3	5	5	5	5	5
2023-04-24 14:30:58	Real, but heavily modified	Not sure if it's real or not	False, but convincing	Real, but heavily modified	False, but convincing	Real, only processed	Not sure if it's real or not	Real, only processed	Not sure if it's real or not	4	3	2	4	2	5	3	5	3
2023-04-24 14:31:36	Real, only processed	Completely false	Not sure if it's real or not	Real, but heavily modified	Completely false	Real, only processed	Completely false	Completely false	Real, only processed	5	1	3	4	1	5	1	1	5
2023-04-24 14:32:01	Not sure if it's real or not	Real, only processed	Real, but heavily modified	Real, only processed	Real, only processed	Real, but heavily modified	Real, but heavily modified	Real, but heavily modified	Real, but heavily modified	3	5	4	5	5	4	4	4	4
2023-04-24 14:32:06	Real, only processed	Real, but heavily modified	Real, only processed	Real, only processed	Real, only processed	Real, only processed	Real, only processed	Real, only processed	False, but convincing	5	4	5	5	5	5	5	5	2
2023-04-24 14:32:16	Not sure if it's real or not	False, but convincing	False, but convincing	False, but convincing	Real, but heavily modified	False, but convincing	False, but convincing	False, but convincing	Real, but heavily modified	3	2	2	2	4	2	2	2	4
2023-04-24 14:33:24	Real, only processed	Real, only processed	Real, only processed	Real, only processed	Not sure if it's real or not	Not sure if it's real or not	Not sure if it's real or not	Not sure if it's real or not	Not sure if it's real or not	5	5	5	5	3	3	3	3	3
2023-04-24 14:33:51	Real, but heavily modified	Completely false	False, but convincing	Real, only processed	False, but convincing	Real, only processed	Completely false	Completely false	Real, but heavily modified	4	1	2	5	2	5	1	1	4
2023-04-24 14:35:06	Not sure if it's real or not	Real, but heavily modified	Real, only processed	Completely false	False, but convincing	Real, only processed	Real, but heavily modified	Completely false	Not sure if it's real or not	3	4	5	1	2	5	4	1	3
2023-04-24 14:39:29	False, but convincing	Real, but heavily modified	Real, only processed	Real, only processed	Real, only processed	Real, only processed	Completely false	Real, only processed	Real, only processed	2	4	5	5	5	5	1	5	5
2023-04-24 14:40:49	Real, only processed	Real, only processed	Real, only processed	Real, only processed	Real, only processed	Completely false	Completely false	Not sure if it's real or not	Real, only processed	5	5	5	5	5	1	1	3	5
2023-04-24 14:43:43	Real, only processed	Real, only processed	Real, but heavily modified	Real, only processed	Real, only processed	Real, only processed	Real, only processed	Real, only processed	Real, only processed	5	5	4	5	5	5	5	5	5
2023-04-24 14:46:30	Real, only processed	False, but convincing	Not sure if it's real or not	Real, only processed	Completely false	Real, only processed	False, but convincing	Real, only processed	Real, only processed	5	2	3	5	1	5	2	5	5
2023-04-24 14:49:02	Real, only processed	False, but convincing	Real, only processed	Real, only processed	Completely false	Real, only processed	Real, only processed	Real, only processed	Real, only processed	5	2	5	5	1	5	5	5	5
2023-04-24 14:51:45	False, but convincing	Real, but heavily modified	Real, but heavily modified	Completely false	Completely false	Not sure if it's real or not	Not sure if it's real or not	Real, but heavily modified	Completely false	2	4	4	1	1	3	3	4	1
2023-04-24 14:52:32	Real, but heavily modified	Real, only processed	Not sure if it's real or not	False, but convincing	Real, only processed	Real, only processed	Not sure if it's real or not	Real, but heavily modified	Real, only processed	4	5	3	2	5	5	3	4	5
2023-04-24 14:52:41	Real, only processed	Real, only processed	Real, only processed	Real, only processed	False, but convincing	Real, only processed	Real, only processed	Real, only processed	Real, but heavily modified	5	5	5	5	2	5	5	5	4
2023-04-24 14:53:47	Not sure if it's real or not	False, but convincing	Real, but heavily modified	Real, but heavily modified	Real, only processed	Real, only processed	Real, only processed	Real, but heavily modified	Real, only processed	3	2	4	4	5	5	5	4	5
2023-04-24 14:54:01	Real, only processed	Completely false	Real, but heavily modified	Real, only processed	Not sure if it's real or not	Real, only processed	False, but convincing	False, but convincing	Real, only processed	5	1	4	5	3	5	2	2	5
2023-04-24 14:55:00	Real, only processed	Not sure if it's real or not	Real, but heavily modified	Real, only processed	Real, only processed	Real, only processed	False, but convincing	False, but convincing	False, but convincing	5	3	4	5	5	5	2	2	2
2023-04-24 14:55:43	Real, only processed	Real, only processed	Real, only processed	Real, only processed	Real, only processed	Real, only processed	Real, but heavily modified	Real, only processed	Real, only processed	5	5	5	5	5	5	4	5	5
2023-04-24 14:56:23	Real, only processed	Real, only processed	Real, only processed	Real, only processed	Real, only processed	Real, only processed	Not sure if it's real or not	Not sure if it's real or not	Not sure if it's real or not	5	5	5	5	5	5	3	3	3
2023-04-24 14:56:40	False, but convincing	Real, but heavily modified	Real, only processed	Real, only processed	Real, only processed	Real, only processed	Completely false	Real, only processed	Real, only processed	2	4	5	5	5	5	1	5	5
2023-04-24 14:57:03	Real, but heavily modified	False, but convincing	Real, only processed	Real, only processed	False, but convincing	Real, only processed	Completely false	Completely false	False, but convincing	4	2	5	5	2	5	1	1	2
2023-04-24 14:57:42	Real, only processed	False, but convincing	Real, only processed	Real, only processed	Real, only processed	Real, only processed	Completely false	False, but convincing	False, but convincing	5	2	5	5	5	5	1	2	2
2023-04-24 14:58:07	False, but convincing	Completely false	Real, only processed	Real, only processed	False, but convincing	Real, only processed	False, but convincing	False, but convincing	Real, only processed	2	1	5	5	2	5	2	2	5
2023-04-24 15:02:23	Not sure if it's real or not	False, but convincing	Real, but heavily modified	Real, only processed	Real, only processed	Real, only processed	Real, only processed	Real, only processed	Real, only processed	3	2	4	5	5	5	5	5	5
2023-04-24 15:02:41	Real, only processed	Real, only processed	Real, only processed	Real, only processed	False, but convincing	Real, only processed	Real, but heavily modified	Real, only processed	Real, only processed	5	5	5	5	2	5	4	5	5
2023-04-24 15:03:32	Real, only processed	Completely false	Real, but heavily modified	Real, only processed	Real, but heavily modified	Real, only processed	False, but convincing	Real, only processed	Real, only processed	5	1	4	5	4	5	2	5	5
2023-04-24 15:04:01	Real, only processed	Real, only processed	Real, only processed	Real, only processed	Real, only processed	Real, only processed	Real, only processed	Real, only processed	Real, only processed	5	5	5	5	5	5	5	5	5
2023-04-24 15:05:02	Real, only processed	False, but convincing	Real, only processed	Real, only processed	Real, only processed	Real, only processed	False, but convincing	False, but convincing	Real, only processed	5	2	5	5	5	5	2	2	5
2023-04-24 15:05:02	Real, only processed	Completely false	Real, only processed	Real, only processed	Real, only processed	Real, only processed	Completely false	False, but convincing	Real, only processed	5	1	5	5	5	5	1	2	5
2023-04-24 15:07:55	Real, only processed	Real, but heavily modified	Real, only processed	Real, only processed	Real, but heavily modified	Real, only processed	False, but convincing	Real, but heavily modified	Real, only processed	5	4	5	5	4	5	2	4	5
2023-04-24 15:09:22	Real, only processed	Not sure if it's real or not	Real, but heavily modified	Real, only processed	False, but convincing	Real, but heavily modified	False, but convincing	Not sure if it's real or not	Not sure if it's real or not	5	3	4	5	2	4	2	3	3
2023-04-24 15:09:35	Not sure if it's real or not	False, but convincing	Real, only processed	Real, only processed	Completely false	False, but convincing	Completely false	Real, only processed	Real, only processed	3	2	5	5	1	2	1	5	5
2023-04-24 15:09:48	Not sure if it's real or not	Real, only processed	Real, but heavily modified	Real, but heavily modified	Real, but heavily modified	Not sure if it's real or not	Completely false	False, but convincing	Completely false	3	5	4	4	4	3	1	2	1
2023-04-24 15:10:41	Not sure if it's real or not	False, but convincing	False, but convincing	False, but convincing	False, but convincing	Real, only processed	Completely false	Not sure if it's real or not	Not sure if it's real or not	3	2	2	2	2	5	1	3	3
2023-04-24 15:12:17	Real, but heavily modified	Real, only processed	Real, only processed	Real, only processed	Real, only processed	Real, only processed	Real, only processed	Real, only processed	Real, only processed	4	5	5	5	5	5	5	5	5
2023-04-24 15:12:38	Real, only processed	Real, but heavily modified	Real, but heavily modified	Real, only processed	Real, only processed	Real, only processed	Real, but heavily modified	Real, only processed	Real, only processed	5	4	4	5	5	5	4	5	5
2023-04-24 15:13:37	Real, only processed	Real, but heavily modified	False, but convincing	Real, but heavily modified	Not sure if it's real or not	Real, only processed	Completely false	Completely false	Real, but heavily modified	5	4	2	4	3	5	1	1	4
2023-04-24 15:16:22	Real, only processed	Completely false	False, but convincing	Real, only processed	Not sure if it's real or not	Real, only processed	Completely false	Real, only processed	Real, only processed	5	1	2	5	3	5	1	5	5
2023-04-24 15:16:52	Real, only processed	Completely false	False, but convincing	Completely false	False, but convincing	Real, only processed	Real, only processed	Not sure if it's real or not	Real, but heavily modified	5	1	2	1	2	5	5	3	4
2023-04-24 15:19:57	Real, but heavily modified	Real, only processed	Real, only processed	Real, only processed	Real, only processed	Real, only processed	Not sure if it's real or not	Real, only processed	Real, only processed	4	5	5	5	5	5	3	5	5
2023-04-24 15:24:03	Not sure if it's real or not	Real, only processed	Real, but heavily modified	False, but convincing	Real, only processed	Real, only processed	Real, only processed	Real, only processed	Real, only processed	3	5	4	2	5	5	5	5	5
2023-04-24 15:24:07	Real, only processed	Real, only processed	Real, only processed	False, but convincing	False, but convincing	Real, only processed	Completely false	False, but convincing	Real, only processed	5	5	5	2	2	5	1	2	5
2023-04-24 15:24:12	Real, but heavily modified	False, but convincing	Real, only processed	False, but convincing	Real, only processed	Real, only processed	Real, only processed	Not sure if it's real or not	Not sure if it's real or not	4	2	5	2	5	5	5	3	3
2023-04-24 15:25:04	Not sure if it's real or not	Real, but heavily modified	Real, but heavily modified	Completely false	Real, only processed	Real, only processed	Not sure if it's real or not	False, but convincing	Not sure if it's real or not	3	4	4	1	5	5	3	2	3
2023-04-24 15:27:12	Real, only processed	Real, but heavily modified	False, but convincing	Real, only processed	Real, only processed	Real, only processed	False, but convincing	False, but convincing	Completely false	5	4	2	5	5	5	2	2	1
2023-04-24 15:27:32	Not sure if it's real or not	Completely false	Real, only processed	Not sure if it's real or not	Real, only processed	Real, only processed	Completely false	Real, only processed	Real, only processed	3	1	5	3	5	5	1	5	5
2023-04-24 15:28:15	Real, but heavily modified	Real, but heavily modified	Not sure if it's real or not	Real, only processed	Real, only processed	Real, only processed	Real, but heavily modified	Not sure if it's real or not	Real, only processed	4	4	3	5	5	5	4	3	5
2023-04-24 15:29:17	Real, only processed	False, but convincing	Not sure if it's real or not	Real, only processed	Real, only processed	Real, only processed	Not sure if it's real or not	False, but convincing	Real, only processed	5	2	3	5	5	5	3	2	5
2023-04-24 15:31:57	Real, only processed	Real, only processed	Real, only processed	Real, only processed	Real, but heavily modified	Real, only processed	Real, only processed	Real, only processed	False, but convincing	5	5	5	5	4	5	5	5	2
2023-04-24 15:32:21	Not sure if it's real or not	Real, only processed	Real, only processed	False, but convincing	False, but convincing	Real, only processed	Completely false	False, but convincing	False, but convincing	3	5	5	2	2	5	1	2	2
2023-04-24 15:33:05	Real, but heavily modified	Completely false	Completely false	Not sure if it's real or not	False, but convincing	Real, only processed	Real, but heavily modified	False, but convincing	Not sure if it's real or not	4	1	1	3	2	5	4	2	3
2023-04-24 15:33:44	Real, only processed	Real, only processed	Real, but heavily modified	Real, but heavily modified	Real, only processed	Real, only processed	Real, only processed	Real, only processed	Real, only processed	5	5	4	4	5	5	5	5	5
2023-04-24 15:35:29	Real, only processed	Not sure if it's real or not	Not sure if it's real or not	Real, but heavily modified	Real, only processed	Real, but heavily modified	Completely false	Completely false	Completely false	5	3	3	4	5	4	1	1	1
2023-04-24 15:35:41	Real, only processed	Not sure if it's real or not	Real, only processed	Not sure if it's real or not	Not sure if it's real or not	Real, only processed	False, but convincing	Completely false	Real, but heavily modified	5	3	5	3	3	5	2	1	4
2023-04-24 15:35:45	Not sure if it's real or not	Real, but heavily modified	Real, but heavily modified	Real, only processed	Real, only processed	Real, only processed	Real, but heavily modified	False, but convincing	Real, but heavily modified	3	4	4	5	5	5	4	2	4
2023-04-24 15:35:50	Real, only processed	Real, but heavily modified	Real, but heavily modified	Real, but heavily modified	Not sure if it's real or not	Real, only processed	Real, only processed	Not sure if it's real or not	Real, only processed	5	4	4	4	3	5	5	3	5
2023-04-24 15:37:03	Real, only processed	Not sure if it's real or not	Real, but heavily modified	Real, only processed	Real, only processed	Real, only processed	Real, only processed	Real, only processed	Real, only processed	5	3	4	5	5	5	5	5	5
2023-04-24 15:37:34	Real, only processed	Real, only processed	Real, only processed	Real, only processed	Real, only processed	Real, only processed	Real, but heavily modified	Real, but heavily modified	Real, only processed	5	5	5	5	5	5	4	4	5
2023-04-24 15:37:45	Real, only processed	Completely false	Not sure if it's real or not	False, but convincing	False, but convincing	Real, only processed	Completely false	False, but convincing	Completely false	5	1	3	2	2	5	1	2	1
2023-04-24 15:41:05	Real, only processed	Real, only processed	Real, only processed	Real, only processed	Real, only processed	Real, only processed	False, but convincing	Not sure if it's real or not	Real, only processed	5	5	5	5	5	5	2	3	5
2023-04-24 15:43:16	Real, but heavily modified	Real, only processed	Real, only processed	Not sure if it's real or not	False, but convincing	Real, only processed	Completely false	Not sure if it's real or not	Not sure if it's real or not	4	5	5	3	2	5	1	3	3
2023-04-24 15:43:38	Real, only processed	False, but convincing	False, but convincing	Not sure if it's real or not	Real, only processed	Real, only processed	False, but convincing	False, but convincing	Real, only processed	5	2	2	3	5	5	2	2	5
2023-04-24 15:45:17	False, but convincing	Completely false	Real, only processed	Real, but heavily modified	Real, only processed	Real, only processed	Real, only processed	Completely false	Real, only processed	2	1	5	4	5	5	5	1	5
2023-04-24 15:46:16	Not sure if it's real or not	Real, only processed	Not sure if it's real or not	False, but convincing	Real, only processed	Real, only processed	False, but convincing	Not sure if it's real or not	Not sure if it's real or not	3	5	3	2	5	5	2	3	3
2023-04-24 15:48:11	Not sure if it's real or not	False, but convincing	Real, only processed	Real, only processed	Real, only processed	Real, only processed	Completely false	Completely false	Real, only processed	3	2	5	5	5	5	1	1	5
2023-04-24 15:51:44	Real, only processed	False, but convincing	Real, only processed	Real, but heavily modified	Not sure if it's real or not	Real, only processed	Completely false	Real, only processed	Real, but heavily modified	5	2	5	4	3	5	1	5	4
2023-04-24 15:55:39	Real, only processed	Real, but heavily modified	Completely false	False, but convincing	False, but convincing	Real, but heavily modified	Real, only processed	Completely false	Real, but heavily modified	5	4	1	2	2	4	5	1	4
2023-04-24 15:57:05	False, but convincing	Not sure if it's real or not	Completely false	Real, only processed	Real, only processed	Real, only processed	Not sure if it's real or not	Real, but heavily modified	Completely false	2	3	1	5	5	5	3	4	1
2023-04-24 15:57:34	Real, but heavily modified	Completely false	Real, but heavily modified	Real, but heavily modified	Real, but heavily modified	Real, but heavily modified	Real, but heavily modified	Real, only processed	Real, but heavily modified	4	1	4	4	4	4	4	5	4
2023-04-24 16:01:56	Real, only processed	Real, but heavily modified	Real, only processed	Not sure if it's real or not	Real, but heavily modified	Real, only processed	Not sure if it's real or not	Real, but heavily modified	False, but convincing	5	4	5	3	4	5	3	4	2
2023-04-24 16:02:30	Real, only processed	Real, only processed	Real, only processed	Real, only processed	Real, only processed	Not sure if it's real or not	Completely false	False, but convincing	Real, only processed	5	5	5	5	5	3	1	2	5
2023-04-24 16:04:21	Real, only processed	Real, only processed	Real, only processed	False, but convincing	Real, but heavily modified	Real, only processed	Real, only processed	Real, only processed	Real, only processed	5	5	5	2	4	5	5	5	5
2023-04-24 16:07:11	Real, only processed	False, but convincing	Real, but heavily modified	Real, only processed	Real, only processed	Real, only processed	Completely false	Real, only processed	Real, only processed	5	2	4	5	5	5	1	5	5
2023-04-24 16:09:57	Real, only processed	Real, but heavily modified	Real, only processed	Real, but heavily modified	False, but convincing	Real, only processed	Real, but heavily modified	Real, only processed	Real, but heavily modified	5	4	5	4	2	5	4	5	4
2023-04-24 16:10:46	Real, only processed	Real, only processed	Real, only processed	Real, but heavily modified	Real, only processed	Not sure if it's real or not	False, but convincing	Not sure if it's real or not	Not sure if it's real or not	5	5	5	4	5	3	2	3	3
2023-04-24 16:14:10	False, but convincing	Real, only processed	Real, but heavily modified	Real, only processed	Real, only processed	Real, but heavily modified	Completely false	Real, but heavily modified	Completely false	2	5	4	5	5	4	1	4	1
2023-04-24 16:14:16	Real, only processed	Real, but heavily modified	Not sure if it's real or not	Real, only processed	Completely false	Real, only processed	Completely false	Not sure if it's real or not	Real, only processed	5	4	3	5	1	5	1	3	5
2023-04-24 16:14:41	Real, only processed	Completely false	Real, but heavily modified	Completely false	Real, only processed	Real, only processed	Completely false	Not sure if it's real or not	Real, only processed	5	1	4	1	5	5	1	3	5
2023-04-24 16:17:24	False, but convincing	Real, but heavily modified	Real, only processed	Real, only processed	False, but convincing	Real, only processed	Completely false	Completely false	Real, but heavily modified	2	4	5	5	2	5	1	1	4
2023-04-24 16:18:43	Real, but heavily modified	Completely false	Real, only processed	Not sure if it's real or not	Real, only processed	Real, only processed	Real, but heavily modified	Not sure if it's real or not	False, but convincing	4	1	5	3	5	5	4	3	2
2023-04-24 16:20:52	Real, only processed	Real, only processed	Real, only processed	Real, only processed	Real, only processed	Real, only processed	Real, only processed	Real, only processed	Real, only processed	5	5	5	5	5	5	5	5	5
2023-04-24 16:23:11	Real, only processed	Completely false	Real, only processed	Real, only processed	Real, only processed	Real, only processed	Real, only processed	Real, only processed	Real, only processed	5	1	5	5	5	5	5	5	5
2023-04-24 16:25:37	Real, only processed	Real, but heavily modified	Real, but heavily modified	Not sure if it's real or not	Real, only processed	Real, only processed	Not sure if it's real or not	Real, but heavily modified	Real, only processed	5	4	4	3	5	5	3	4	5
2023-04-24 16:26:12	Real, only processed	False, but convincing	False, but convincing	False, but convincing	False, but convincing	Real, but heavily modified	False, but convincing	False, but convincing	Real, only processed	5	2	2	2	2	4	2	2	5
2023-04-24 16:28:08	Real, but heavily modified	Not sure if it's real or not	Real, only processed	Not sure if it's real or not	Real, only processed	Real, but heavily modified	Completely false	Real, only processed	Real, but heavily modified	4	3	5	3	5	4	1	5	4
2023-04-24 16:36:04	Real, only processed	Real, but heavily modified	Real, but heavily modified	Real, but heavily modified	Real, only processed	Real, only processed	False, but convincing	Not sure if it's real or not	Real, only processed	5	4	4	4	5	5	2	3	5
2023-04-24 16:36:40	Real, only processed	False, but convincing	Not sure if it's real or not	Real, only processed	False, but convincing	Real, only processed	Completely false	Not sure if it's real or not	Real, only processed	5	2	3	5	2	5	1	3	5
2023-04-24 16:37:40	Real, only processed	Real, only processed	Real, only processed	Real, only processed	Real, only processed	Real, only processed	Real, only processed	Real, only processed	Real, only processed	5	5	5	5	5	5	5	5	5
2023-04-24 16:41:40	Real, but heavily modified	Real, only processed	Real, only processed	Real, only processed	Real, only processed	Real, only processed	Not sure if it's real or not	Not sure if it's real or not	Real, only processed	4	5	5	5	5	5	3	3	5
2023-04-24 16:45:03	Real, only processed	Completely false	False, but convincing	Real, only processed	Real, only processed	Real, only processed	Not sure if it's real or not	Real, only processed	Real, only processed	5	1	2	5	5	5	3	5	5
2023-04-24 16:46:28	Real, only processed	Real, only processed	Real, only processed	False, but convincing	Real, only processed	Real, only processed	Completely false	Not sure if it's real or not	Real, only processed	5	5	5	2	5	5	1	3	5
2023-04-24 16:46:54	Real, only processed	Not sure if it's real or not	Real, but heavily modified	Real, only processed	Real, but heavily modified	Real, only processed	Real, but heavily modified	Real, but heavily modified	Real, but heavily modified	5	3	4	5	4	5	4	4	4
2023-04-24 16:47:05	Real, only processed	Completely false	Real, but heavily modified	False, but convincing	Real, only processed	Real, only processed	False, but convincing	Real, only processed	Not sure if it's real or not	5	1	4	2	5	5	2	5	3
2023-04-24 16:48:56	Real, only processed	Real, only processed	Real, only processed	Real, only processed	Real, only processed	Real, only processed	Real, only processed	Real, only processed	Real, only processed	5	5	5	5	5	5	5	5	5
2023-04-24 16:49:42	Real, only processed	Real, but heavily modified	Not sure if it's real or not	Real, only processed	False, but convincing	Not sure if it's real or not	Completely false	Completely false	Not sure if it's real or not	5	4	3	5	2	3	1	1	3
2023-04-24 16:49:42	Real, only processed	Real, only processed	Real, but heavily modified	Real, only processed	Real, only processed	Real, only processed	Completely false	False, but convincing	False, but convincing	5	5	4	5	5	5	1	2	2
2023-04-24 16:49:45	Completely false	Real, only processed	False, but convincing	Completely false	Real, but heavily modified	Completely false	Not sure if it's real or not	Real, only processed	Completely false	1	5	2	1	4	1	3	5	1
2023-04-24 16:52:42	Not sure if it's real or not	Completely false	Completely false	Real, but heavily modified	Completely false	Real, only processed	Not sure if it's real or not	Not sure if it's real or not	Real, but heavily modified	3	1	1	4	1	5	3	3	4
2023-04-24 16:53:31	Real, only processed	Real, but heavily modified	Real, only processed	Real, only processed	Real, only processed	Real, only processed	Not sure if it's real or not	Real, only processed	Real, only processed	5	4	5	5	5	5	3	5	5
2023-04-24 16:54:23	Real, only processed	Real, but heavily modified	Real, only processed	Real, only processed	Real, but heavily modified	Real, only processed	Real, but heavily modified	Real, but heavily modified	Real, only processed	5	4	5	5	4	5	4	4	5
2023-04-24 16:56:37	Real, only processed	Real, only processed	Real, only processed	Real, only processed	Real, only processed	Real, only processed	Not sure if it's real or not	Not sure if it's real or not	Real, only processed	5	5	5	5	5	5	3	3	5
2023-04-24 17:02:07	Completely false	Real, only processed	Real, only processed	Not sure if it's real or not	Real, only processed	Real, only processed	Real, only processed	Not sure if it's real or not	Real, only processed	1	5	5	3	5	5	5	3	5
2023-04-24 17:08:13	Real, only processed	Completely false	Not sure if it's real or not	False, but convincing	Real, but heavily modified	Real, only processed	Completely false	Completely false	Real, only processed	5	1	3	2	4	5	1	1	5
2023-04-24 17:14:01	Real, only processed	Real, but heavily modified	Real, but heavily modified	Real, but heavily modified	Real, only processed	Real, only processed	Real, but heavily modified	Real, only processed	Real, only processed	5	4	4	4	5	5	4	5	5
2023-04-24 17:27:35	Real, only processed	Real, but heavily modified	Real, but heavily modified	Real, only processed	Real, only processed	Real, only processed	Completely false	Real, only processed	Not sure if it's real or not	5	4	4	5	5	5	1	5	3
2023-04-24 17:41:55	Real, only processed	Real, but heavily modified	Real, but heavily modified	Not sure if it's real or not	Not sure if it's real or not	Real, only processed	Completely false	Real, only processed	Real, only processed	5	4	4	3	3	5	1	5	5
2023-04-24 17:43:42	Real, only processed	Real, only processed	Real, but heavily modified	Real, only processed	Real, but heavily modified	Real, only processed	Real, only processed	Real, only processed	Real, only processed	5	5	4	5	4	5	5	5	5
2023-04-24 17:44:50	Not sure if it's real or not	Real, only processed	Real, only processed	Real, but heavily modified	Not sure if it's real or not	Real, only processed	False, but convincing	Real, but heavily modified	Completely false	3	5	5	4	3	5	2	4	1
2023-04-24 17:57:33	Real, only processed	False, but convincing	Real, only processed	Real, only processed	Completely false	Real, only processed	Real, but heavily modified	Real, only processed	Real, only processed	5	2	5	5	1	5	4	5	5
2023-04-24 17:59:15	Real, but heavily modified	False, but convincing	Real, only processed	False, but convincing	Not sure if it's real or not	Real, only processed	Real, only processed	Real, only processed	Real, only processed	4	2	5	2	3	5	5	5	5
2023-04-24 18:02:27	Real, only processed	Not sure if it's real or not	Real, only processed	Real, but heavily modified	False, but convincing	Real, only processed	Completely false	Completely false	Not sure if it's real or not	5	3	5	4	2	5	1	1	3
2023-04-24 18:04:32	Real, only processed	Completely false	Real, but heavily modified	Real, but heavily modified	Real, but heavily modified	Real, only processed	Real, but heavily modified	Real, only processed	Real, but heavily modified	5	1	4	4	4	5	4	5	4
2023-04-24 18:08:21	Real, only processed	Real, but heavily modified	Real, only processed	Real, only processed	Real, only processed	Real, only processed	Not sure if it's real or not	Real, but heavily modified	Real, only processed	5	4	5	5	5	5	3	4	5
2023-04-24 18:11:31	Real, but heavily modified	False, but convincing	Real, but heavily modified	Real, only processed	Not sure if it's real or not	Real, only processed	False, but convincing	Completely false	Not sure if it's real or not	4	2	4	5	3	5	2	1	3
2023-04-24 18:11:54	Real, only processed	Real, only processed	Real, only processed	Real, only processed	Real, only processed	Real, only processed	Not sure if it's real or not	Real, only processed	Real, only processed	5	5	5	5	5	5	3	5	5
2023-04-24 18:21:08	Real, only processed	Real, but heavily modified	Real, but heavily modified	Completely false	Completely false	Real, only processed	Completely false	False, but convincing	Not sure if it's real or not	5	4	4	1	1	5	1	2	3
2023-04-24 18:27:00	Real, but heavily modified	False, but convincing	Completely false	Not sure if it's real or not	False, but convincing	Not sure if it's real or not	Completely false	Completely false	Not sure if it's real or not	4	2	1	3	2	3	1	1	3
2023-04-24 18:30:35	Real, but heavily modified	Not sure if it's real or not	Not sure if it's real or not	Real, only processed	Real, only processed	Real, only processed	False, but convincing	Completely false	Not sure if it's real or not	4	3	3	5	5	5	2	1	3
2023-04-24 18:31:46	Real, only processed	Real, but heavily modified	Real, only processed	Real, only processed	Real, only processed	Real, only processed	Not sure if it's real or not	Real, only processed	Real, only processed	5	4	5	5	5	5	3	5	5
2023-04-24 18:35:04	Real, only processed	Real, but heavily modified	Real, only processed	Real, only processed	Real, but heavily modified	Real, only processed	Real, only processed	Real, but heavily modified	Completely false	5	4	5	5	4	5	5	4	1
2023-04-24 18:37:58	Real, only processed	Not sure if it's real or not	Not sure if it's real or not	Real, only processed	False, but convincing	Real, only processed	Real, only processed	Completely false	False, but convincing	5	3	3	5	2	5	5	1	2
2023-04-24 18:41:20	Real, but heavily modified	Real, only processed	False, but convincing	False, but convincing	Real, only processed	Real, only processed	Completely false	False, but convincing	False, but convincing	4	5	2	2	5	5	1	2	2
2023-04-24 18:47:58	Real, only processed	False, but convincing	Real, but heavily modified	Real, only processed	Real, only processed	Real, only processed	Real, but heavily modified	Real, but heavily modified	Real, only processed	5	2	4	5	5	5	4	4	5
2023-04-24 18:48:07	Real, but heavily modified	Completely false	False, but convincing	Completely false	Real, only processed	Real, only processed	False, but convincing	False, but convincing	False, but convincing	4	1	2	1	5	5	2	2	2
2023-04-24 18:52:04	False, but convincing	Completely false	False, but convincing	Real, but heavily modified	Real, only processed	Real, only processed	Real, but heavily modified	Real, only processed	Real, only processed	2	1	2	4	5	5	4	5	5
2023-04-24 18:58:02	Real, only processed	False, but convincing	Real, only processed	Real, only processed	Completely false	Real, only processed	Completely false	Real, only processed	Real, only processed	5	2	5	5	1	5	1	5	5
2023-04-24 18:59:12	False, but convincing	Completely false	Real, only processed	Real, only processed	Real, only processed	Real, but heavily modified	Real, only processed	Real, only processed	Real, only processed	2	1	5	5	5	4	5	5	5
2023-04-24 19:00:47	Real, only processed	Completely false	Completely false	Real, only processed	Real, only processed	Real, only processed	Completely false	Real, but heavily modified	Real, only processed	5	1	1	5	5	5	1	4	5
2023-04-24 19:02:00	Real, only processed	Real, only processed	Completely false	Real, only processed	False, but convincing	Real, but heavily modified	Completely false	Completely false	False, but convincing	5	5	1	5	2	4	1	1	2
2023-04-24 19:03:55	Real, but heavily modified	Not sure if it's real or not	Real, but heavily modified	False, but convincing	Real, only processed	Real, only processed	Real, only processed	Real, only processed	Real, only processed	4	3	4	2	5	5	5	5	5
2023-04-24 19:03:55	Not sure if it's real or not	False, but convincing	Not sure if it's real or not	False, but convincing	Not sure if it's real or not	Not sure if it's real or not	Not sure if it's real or not	Completely false	Completely false	3	2	3	2	3	3	3	1	1
2023-04-24 19:04:19	Real, only processed	False, but convincing	Not sure if it's real or not	Real, only processed	Real, only processed	Real, only processed	Not sure if it's real or not	Real, only processed	Real, but heavily modified	5	2	3	5	5	5	3	5	4
2023-04-24 19:06:47	Real, but heavily modified	Real, but heavily modified	False, but convincing	False, but convincing	Completely false	Real, only processed	False, but convincing	Real, but heavily modified	Not sure if it's real or not	4	4	2	2	1	5	2	4	3
2023-04-24 19:09:10	Real, only processed	Real, only processed	Real, only processed	Real, but heavily modified	Not sure if it's real or not	Real, only processed	Completely false	Real, but heavily modified	Real, but heavily modified	5	5	5	4	3	5	1	4	4
2023-04-24 19:10:29	Real, only processed	Real, but heavily modified	Real, only processed	Real, only processed	Not sure if it's real or not	Real, only processed	Completely false	Not sure if it's real or not	Real, only processed	5	4	5	5	3	5	1	3	5
2023-04-24 19:11:10	Real, but heavily modified	Real, only processed	Real, only processed	Real, only processed	False, but convincing	Real, only processed	Real, only processed	False, but convincing	False, but convincing	4	5	5	5	2	5	5	2	2
2023-04-24 19:13:13	Real, only processed	Real, but heavily modified	Real, but heavily modified	Real, only processed	Completely false	Real, only processed	False, but convincing	Real, only processed	Real, but heavily modified	5	4	4	5	1	5	2	5	4
2023-04-24 19:14:48	Not sure if it's real or not	Real, only processed	Real, only processed	Real, only processed	Not sure if it's real or not	Real, only processed	Real, only processed	Completely false	Real, only processed	3	5	5	5	3	5	5	1	5
2023-04-24 19:22:58	Real, but heavily modified	Real, only processed	Not sure if it's real or not	Not sure if it's real or not	Real, but heavily modified	Real, only processed	Not sure if it's real or not	Real, only processed	False, but convincing	4	5	3	3	4	5	3	5	2
2023-04-24 19:23:13	Real, only processed	Real, but heavily modified	Real, only processed	Real, but heavily modified	Real, only processed	Real, only processed	Real, only processed	Real, only processed	Real, only processed	5	4	5	4	5	5	5	5	5
2023-04-24 19:25:03	Not sure if it's real or not	Not sure if it's real or not	Not sure if it's real or not	Not sure if it's real or not	Not sure if it's real or not	Real, only processed	Not sure if it's real or not	Not sure if it's real or not	Not sure if it's real or not	3	3	3	3	3	5	3	3	3
2023-04-24 19:26:37	Not sure if it's real or not	False, but convincing	Real, only processed	Real, but heavily modified	Real, only processed	Real, only processed	Not sure if it's real or not	False, but convincing	Not sure if it's real or not	3	2	5	4	5	5	3	2	3
2023-04-24 19:27:37	False, but convincing	Not sure if it's real or not	Completely false	False, but convincing	Not sure if it's real or not	Real, only processed	Completely false	Real, only processed	Real, only processed	2	3	1	2	3	5	1	5	5
2023-04-24 19:28:31	Real, only processed	Completely false	Real, only processed	Completely false	Real, but heavily modified	Real, only processed	False, but convincing	False, but convincing	Real, only processed	5	1	5	1	4	5	2	2	5
2023-04-24 19:29:01	Real, only processed	Real, but heavily modified	Real, only processed	False, but convincing	Real, only processed	Real, only processed	Not sure if it's real or not	Completely false	Real, only processed	5	4	5	2	5	5	3	1	5
2023-04-24 19:31:18	Real, only processed	Real, only processed	Real, only processed	Real, only processed	Real, only processed	Real, only processed	Real, only processed	Real, only processed	Real, only processed	5	5	5	5	5	5	5	5	5
2023-04-24 19:31:55	Real, only processed	Completely false	Completely false	Real, only processed	Real, but heavily modified	Real, only processed	False, but convincing	Real, only processed	Real, only processed	5	1	1	5	4	5	2	5	5
2023-04-24 19:33:35	Real, only processed	Completely false	Real, only processed	Real, only processed	False, but convincing	Real, only processed	Completely false	Real, only processed	Real, only processed	5	1	5	5	2	5	1	5	5
2023-04-24 19:35:00	Not sure if it's real or not	Completely false	Real, only processed	Real, only processed	Real, but heavily modified	Real, only processed	Completely false	False, but convincing	Completely false	3	1	5	5	4	5	1	2	1
2023-04-24 19:36:54	Real, only processed	Real, but heavily modified	Real, only processed	Real, only processed	Real, only processed	Real, only processed	Real, only processed	False, but convincing	Real, only processed	5	4	5	5	5	5	5	2	5
2023-04-24 19:37:30	Real, only processed	Real, but heavily modified	Real, only processed	Completely false	Real, only processed	Real, only processed	Not sure if it's real or not	Real, only processed	Real, only processed	5	4	5	1	5	5	3	5	5
2023-04-24 19:40:18	Real, only processed	Not sure if it's real or not	Real, only processed	Real, only processed	Completely false	Completely false	Not sure if it's real or not	False, but convincing	Real, only processed	5	3	5	5	1	1	3	2	5
2023-04-24 19:40:51	Real, only processed	Real, but heavily modified	False, but convincing	Real, but heavily modified	Completely false	Real, only processed	Real, but heavily modified	Real, only processed	Real, only processed	5	4	2	4	1	5	4	5	5
2023-04-24 19:41:33	Real, but heavily modified	Real, only processed	Not sure if it's real or not	Real, only processed	Real, only processed	False, but convincing	Completely false	Not sure if it's real or not	False, but convincing	4	5	3	5	5	2	1	3	2
2023-04-24 19:42:36	Real, only processed	Real, but heavily modified	Not sure if it's real or not	Real, only processed	Real, only processed	Real, but heavily modified	Real, only processed	Real, but heavily modified	Real, only processed	5	4	3	5	5	4	5	4	5
2023-04-24 19:43:33	Real, only processed	Real, only processed	Not sure if it's real or not	Real, only processed	Real, only processed	Real, only processed	False, but convincing	False, but convincing	Real, only processed	5	5	3	5	5	5	2	2	5
2023-04-24 19:44:34	Real, but heavily modified	Completely false	Real, only processed	False, but convincing	Real, only processed	Not sure if it's real or not	Real, but heavily modified	False, but convincing	Real, only processed	4	1	5	2	5	3	4	2	5
2023-04-24 19:44:46	Real, only processed	False, but convincing	Real, only processed	Real, only processed	Real, but heavily modified	Real, only processed	False, but convincing	Real, only processed	Real, only processed	5	2	5	5	4	5	2	5	5
2023-04-24 19:45:26	Not sure if it's real or not	Real, only processed	False, but convincing	Real, but heavily modified	Real, only processed	Real, only processed	Real, but heavily modified	Not sure if it's real or not	Real, only processed	3	5	2	4	5	5	4	3	5
2023-04-24 19:47:46	Not sure if it's real or not	Real, only processed	Not sure if it's real or not	Not sure if it's real or not	False, but convincing	Real, only processed	Completely false	Not sure if it's real or not	Not sure if it's real or not	3	5	3	3	2	5	1	3	3
2023-04-24 19:49:29	False, but convincing	False, but convincing	Not sure if it's real or not	Completely false	False, but convincing	Real, only processed	Completely false	Completely false	Real, but heavily modified	2	2	3	1	2	5	1	1	4
2023-04-24 19:49:46	Not sure if it's real or not	Real, only processed	Real, only processed	Not sure if it's real or not	Real, only processed	Real, only processed	Real, only processed	Real, only processed	Real, only processed	3	5	5	3	5	5	5	5	5
2023-04-24 19:51:47	Real, only processed	False, but convincing	Not sure if it's real or not	Real, only processed	False, but convincing	Real, only processed	Not sure if it's real or not	False, but convincing	Real, only processed	5	2	3	5	2	5	3	2	5
2023-04-24 19:56:36	Not sure if it's real or not	Completely false	False, but convincing	Real, but heavily modified	False, but convincing	Real, but heavily modified	Real, only processed	Real, but heavily modified	Real, only processed	3	1	2	4	2	4	5	4	5
2023-04-24 19:57:03	False, but convincing	Completely false	Not sure if it's real or not	False, but convincing	Real, but heavily modified	Real, but heavily modified	Completely false	Real, but heavily modified	Real, only processed	2	1	3	2	4	4	1	4	5
2023-04-24 19:57:51	Real, only processed	Real, only processed	Real, only processed	Real, only processed	Real, only processed	Real, only processed	Real, only processed	Real, only processed	Real, only processed	5	5	5	5	5	5	5	5	5
2023-04-24 19:58:35	Not sure if it's real or not	Completely false	Real, but heavily modified	Real, only processed	Real, only processed	Real, only processed	Completely false	Not sure if it's real or not	Not sure if it's real or not	3	1	4	5	5	5	1	3	3
2023-04-24 20:03:17	Not sure if it's real or not	False, but convincing	Real, only processed	Completely false	Not sure if it's real or not	Real, only processed	False, but convincing	Real, but heavily modified	Real, only processed	3	2	5	1	3	5	2	4	5
2023-04-24 20:09:47	Real, only processed	False, but convincing	Real, only processed	Real, only processed	Not sure if it's real or not	Real, only processed	False, but convincing	Real, only processed	False, but convincing	5	2	5	5	3	5	2	5	2
2023-04-24 20:11:37	Not sure if it's real or not	Real, only processed	Not sure if it's real or not	Not sure if it's real or not	Real, only processed	Real, only processed	Real, only processed	Real, only processed	Real, only processed	3	5	3	3	5	5	5	5	5
2023-04-24 20:14:10	Real, but heavily modified	Real, only processed	Real, only processed	Real, only processed	Real, but heavily modified	Real, only processed	Real, but heavily modified	Real, only processed	Real, only processed	4	5	5	5	4	5	4	5	5
2023-04-24 20:14:15	Not sure if it's real or not	False, but convincing	Real, only processed	Completely false	Real, only processed	False, but convincing	Real, only processed	False, but convincing	Not sure if it's real or not	3	2	5	1	5	2	5	2	3
2023-04-24 20:16:19	Not sure if it's real or not	Real, only processed	Real, only processed	Real, only processed	Real, only processed	Real, only processed	Not sure if it's real or not	Real, only processed	Real, only processed	3	5	5	5	5	5	3	5	5
2023-04-24 20:16:52	Real, only processed	Real, but heavily modified	Real, but heavily modified	Real, but heavily modified	Real, only processed	Real, only processed	Real, only processed	Real, only processed	Real, only processed	5	4	4	4	5	5	5	5	5
2023-04-24 20:21:36	Real, only processed	Real, only processed	Real, but heavily modified	Real, only processed	Real, only processed	Real, only processed	Real, only processed	Real, but heavily modified	Real, only processed	5	5	4	5	5	5	5	4	5
2023-04-24 20:29:46	Real, but heavily modified	Completely false	Completely false	Real, only processed	Real, only processed	Real, only processed	Real, only processed	Real, only processed	Real, only processed	4	1	1	5	5	5	5	5	5
2023-04-24 20:34:12	Not sure if it's real or not	Real, only processed	Not sure if it's real or not	Not sure if it's real or not	Real, only processed	Real, only processed	Not sure if it's real or not	Not sure if it's real or not	Real, only processed	3	5	3	3	5	5	3	3	5
2023-04-24 20:35:12	Real, but heavily modified	Completely false	Completely false	Not sure if it's real or not	Real, but heavily modified	Real, only processed	Completely false	Real, but heavily modified	Real, only processed	4	1	1	3	4	5	1	4	5
2023-04-24 20:36:29	Real, but heavily modified	False, but convincing	Real, but heavily modified	Real, only processed	Real, only processed	Real, only processed	False, but convincing	Real, only processed	Real, only processed	4	2	4	5	5	5	2	5	5
2023-04-24 20:38:28	Real, only processed	Real, but heavily modified	Real, but heavily modified	Real, only processed	Real, only processed	Real, only processed	Completely false	Completely false	Real, only processed	5	4	4	5	5	5	1	1	5
2023-04-24 20:40:51	Real, only processed	Completely false	Real, but heavily modified	Real, only processed	Real, only processed	Real, only processed	Completely false	Not sure if it's real or not	Real, only processed	5	1	4	5	5	5	1	3	5
2023-04-24 20:42:14	Real, only processed	Real, but heavily modified	Not sure if it's real or not	Completely false	Real, only processed	Real, only processed	Completely false	Not sure if it's real or not	Real, only processed	5	4	3	1	5	5	1	3	5
2023-04-24 20:43:14	Real, only processed	Real, only processed	Real, only processed	Real, only processed	Real, only processed	Real, only processed	Real, only processed	Real, only processed	Real, only processed	5	5	5	5	5	5	5	5	5
2023-04-24 20:45:23	Real, but heavily modified	Completely false	False, but convincing	False, but convincing	Completely false	Real, only processed	Completely false	Real, but heavily modified	Completely false	4	1	2	2	1	5	1	4	1
2023-04-24 20:45:52	Real, but heavily modified	Real, but heavily modified	False, but convincing	Real, but heavily modified	Real, but heavily modified	Real, only processed	Not sure if it's real or not	Real, but heavily modified	Real, but heavily modified	4	4	2	4	4	5	3	4	4
2023-04-24 20:47:30	Real, but heavily modified	Not sure if it's real or not	Real, only processed	Real, only processed	Real, only processed	Real, only processed	False, but convincing	Completely false	Real, only processed	4	3	5	5	5	5	2	1	5
2023-04-24 20:54:57	Real, only processed	False, but convincing	Real, but heavily modified	Real, only processed	Not sure if it's real or not	Real, only processed	False, but convincing	False, but convincing	Real, only processed	5	2	4	5	3	5	2	2	5
2023-04-24 20:57:21	Real, but heavily modified	Not sure if it's real or not	False, but convincing	Not sure if it's real or not	Real, but heavily modified	Real, only processed	Completely false	Real, only processed	Real, only processed	4	3	2	3	4	5	1	5	5
2023-04-24 21:06:14	Real, only processed	False, but convincing	Real, only processed	Real, only processed	Real, only processed	Real, only processed	Real, but heavily modified	Real, but heavily modified	Real, only processed	5	2	5	5	5	5	4	4	5
2023-04-24 21:06:31	Completely false	Completely false	Completely false	Not sure if it's real or not	Completely false	Not sure if it's real or not	Completely false	Completely false	Completely false	1	1	1	3	1	3	1	1	1
2023-04-24 21:10:13	Real, only processed	Real, but heavily modified	Not sure if it's real or not	False, but convincing	Real, but heavily modified	Real, only processed	False, but convincing	Real, but heavily modified	Real, only processed	5	4	3	2	4	5	2	4	5
2023-04-24 21:10:48	Real, but heavily modified	Completely false	Real, only processed	Real, only processed	Real, only processed	Real, only processed	False, but convincing	False, but convincing	Real, only processed	4	1	5	5	5	5	2	2	5
2023-04-24 21:12:48	Real, only processed	Not sure if it's real or not	False, but convincing	Not sure if it's real or not	False, but convincing	Real, only processed	False, but convincing	Not sure if it's real or not	Real, only processed	5	3	2	3	2	5	2	3	5
2023-04-24 21:13:26	Real, but heavily modified	Completely false	Real, only processed	Real, only processed	Completely false	Real, only processed	Completely false	Completely false	Real, only processed	4	1	5	5	1	5	1	1	5
2023-04-24 21:14:44	Real, only processed	False, but convincing	Real, only processed	False, but convincing	Real, but heavily modified	Real, only processed	Completely false	Real, but heavily modified	Real, only processed	5	2	5	2	4	5	1	4	5
2023-04-24 21:14:49	Real, only processed	False, but convincing	Real, only processed	Real, only processed	Real, only processed	Real, only processed	Real, only processed	Real, only processed	Real, only processed	5	2	5	5	5	5	5	5	5
2023-04-24 21:15:27	Real, only processed	Completely false	False, but convincing	Real, but heavily modified	Completely false	Real, only processed	Completely false	False, but convincing	Real, only processed	5	1	2	4	1	5	1	2	5
2023-04-24 21:15:32	Not sure if it's real or not	False, but convincing	Real, but heavily modified	Real, only processed	Real, only processed	Real, but heavily modified	False, but convincing	False, but convincing	Real, only processed	3	2	4	5	5	4	2	2	5
2023-04-24 21:16:25	Not sure if it's real or not	Completely false	Real, only processed	Real, but heavily modified	Not sure if it's real or not	Real, only processed	Completely false	Real, but heavily modified	Not sure if it's real or not	3	1	5	4	3	5	1	4	3
2023-04-24 21:16:29	Real, only processed	Completely false	Real, only processed	Real, only processed	Real, only processed	Real, only processed	Completely false	Completely false	False, but convincing	5	1	5	5	5	5	1	1	2
2023-04-24 21:16:42	Not sure if it's real or not	False, but convincing	Real, only processed	Not sure if it's real or not	Real, but heavily modified	Real, only processed	Completely false	False, but convincing	Real, but heavily modified	3	2	5	3	4	5	1	2	4
2023-04-24 21:16:54	Not sure if it's real or not	False, but convincing	Real, only processed	Real, only processed	Real, only processed	Real, only processed	Completely false	False, but convincing	Completely false	3	2	5	5	5	5	1	2	1
2023-04-24 21:17:46	Real, only processed	False, but convincing	Real, but heavily modified	Not sure if it's real or not	Real, but heavily modified	Real, only processed	Not sure if it's real or not	Not sure if it's real or not	Not sure if it's real or not	5	2	4	3	4	5	3	3	3
2023-04-24 21:18:41	False, but convincing	Real, only processed	Real, only processed	Real, but heavily modified	Real, only processed	Real, only processed	Real, but heavily modified	Real, but heavily modified	Completely false	2	5	5	4	5	5	4	4	1
2023-04-24 21:18:44	False, but convincing	Real, but heavily modified	Real, only processed	Real, but heavily modified	Real, only processed	Real, only processed	Real, but heavily modified	Real, but heavily modified	False, but convincing	2	4	5	4	5	5	4	4	2
2023-04-24 21:18:49	False, but convincing	Completely false	False, but convincing	Completely false	Real, but heavily modified	Real, but heavily modified	Not sure if it's real or not	False, but convincing	Not sure if it's real or not	2	1	2	1	4	4	3	2	3
2023-04-24 21:19:08	Real, only processed	Completely false	Real, but heavily modified	Real, only processed	Not sure if it's real or not	Real, only processed	Not sure if it's real or not	False, but convincing	Real, but heavily modified	5	1	4	5	3	5	3	2	4
2023-04-24 21:21:31	Real, only processed	False, but convincing	Real, only processed	Not sure if it's real or not	Real, only processed	Completely false	Real, but heavily modified	Not sure if it's real or not	Completely false	5	2	5	3	5	1	4	3	1
2023-04-24 21:22:45	Real, only processed	Not sure if it's real or not	Real, only processed	Real, only processed	Real, only processed	Real, only processed	Real, only processed	Real, only processed	Real, only processed	5	3	5	5	5	5	5	5	5
2023-04-24 21:23:20	Real, but heavily modified	Real, only processed	Real, only processed	Real, but heavily modified	Not sure if it's real or not	Real, only processed	Real, only processed	Real, only processed	Real, but heavily modified	4	5	5	4	3	5	5	5	4
2023-04-24 21:31:31	Real, only processed	Real, but heavily modified	Real, only processed	Real, only processed	Real, but heavily modified	Real, but heavily modified	Real, only processed	Real, only processed	Real, but heavily modified	5	4	5	5	4	4	5	5	4
2023-04-24 21:33:35	Real, only processed	Real, but heavily modified	Real, only processed	Real, only processed	Real, but heavily modified	Real, only processed	Not sure if it's real or not	Real, but heavily modified	Real, only processed	5	4	5	5	4	5	3	4	5
2023-04-24 21:37:54	Real, only processed	Not sure if it's real or not	Real, only processed	Real, only processed	Real, only processed	Real, only processed	False, but convincing	Real, only processed	Real, only processed	5	3	5	5	5	5	2	5	5
2023-04-24 21:41:33	Real, only processed	Completely false	Not sure if it's real or not	Real, only processed	Not sure if it's real or not	Real, only processed	Real, but heavily modified	Not sure if it's real or not	Real, only processed	5	1	3	5	3	5	4	3	5
2023-04-24 21:43:26	Real, but heavily modified	Real, only processed	Real, only processed	Real, but heavily modified	Real, but heavily modified	Not sure if it's real or not	Real, only processed	Not sure if it's real or not	Not sure if it's real or not	4	5	5	4	4	3	5	3	3
2023-04-24 21:44:10	Not sure if it's real or not	Not sure if it's real or not	Not sure if it's real or not	Not sure if it's real or not	Not sure if it's real or not	Not sure if it's real or not	Not sure if it's real or not	False, but convincing	Completely false	3	3	3	3	3	3	3	2	1
2023-04-24 21:48:24	Real, but heavily modified	Real, only processed	Real, only processed	Not sure if it's real or not	Real, only processed	Real, only processed	Real, but heavily modified	Real, only processed	Not sure if it's real or not	4	5	5	3	5	5	4	5	3
2023-04-24 22:05:48	Real, only processed	Real, only processed	Real, only processed	Real, only processed	Real, only processed	Real, only processed	Real, but heavily modified	Real, only processed	Real, only processed	5	5	5	5	5	5	4	5	5
2023-04-24 22:08:33	False, but convincing	Real, but heavily modified	Real, only processed	Not sure if it's real or not	False, but convincing	Real, only processed	False, but convincing	Completely false	Real, only processed	2	4	5	3	2	5	2	1	5
2023-04-24 22:10:09	Not sure if it's real or not	Real, only processed	Real, only processed	Real, but heavily modified	Real, only processed	Real, only processed	Not sure if it's real or not	Completely false	Real, only processed	3	5	5	4	5	5	3	1	5
2023-04-24 22:20:04	Real, only processed	Real, only processed	Real, only processed	Real, only processed	Real, only processed	Real, only processed	Real, only processed	Not sure if it's real or not	Real, only processed	5	5	5	5	5	5	5	3	5
2023-04-24 22:25:45	Real, only processed	Real, only processed	Real, only processed	False, but convincing	Completely false	Real, only processed	Completely false	False, but convincing	Not sure if it's real or not	5	5	5	2	1	5	1	2	3
2023-04-24 22:28:51	Real, but heavily modified	Real, only processed	Real, only processed	Not sure if it's real or not	Real, only processed	Real, only processed	False, but convincing	False, but convincing	Real, only processed	4	5	5	3	5	5	2	2	5
2023-04-24 22:29:03	Real, but heavily modified	Real, only processed	Real, only processed	Real, only processed	Real, only processed	Real, only processed	Not sure if it's real or not	Real, only processed	Real, only processed	4	5	5	5	5	5	3	5	5
2023-04-24 22:29:32	Real, only processed	Real, only processed	Real, only processed	Real, only processed	Real, only processed	Real, only processed	Not sure if it's real or not	Not sure if it's real or not	Not sure if it's real or not	5	5	5	5	5	5	3	3	3
2023-04-24 22:29:50	False, but convincing	Not sure if it's real or not	Real, but heavily modified	Real, only processed	Real, only processed	Not sure if it's real or not	Real, but heavily modified	False, but convincing	Real, only processed	2	3	4	5	5	3	4	2	5
2023-04-24 22:30:03	Real, but heavily modified	Completely false	Not sure if it's real or not	Real, only processed	Real, only processed	Real, only processed	Not sure if it's real or not	Real, only processed	False, but convincing	4	1	3	5	5	5	3	5	2
2023-04-24 22:31:59	Real, but heavily modified	False, but convincing	Not sure if it's real or not	False, but convincing	Not sure if it's real or not	Real, only processed	False, but convincing	Not sure if it's real or not	Real, only processed	4	2	3	2	3	5	2	3	5
2023-04-24 22:32:10	Real, only processed	Real, but heavily modified	Real, only processed	Real, only processed	Real, only processed	Real, only processed	Real, but heavily modified	Real, only processed	Real, only processed	5	4	5	5	5	5	4	5	5
2023-04-24 22:32:20	Real, only processed	Completely false	Real, only processed	False, but convincing	Real, only processed	Real, only processed	Completely false	Not sure if it's real or not	Real, only processed	5	1	5	2	5	5	1	3	5
2023-04-24 22:32:24	Real, only processed	False, but convincing	Real, but heavily modified	Real, but heavily modified	Real, only processed	Real, only processed	Not sure if it's real or not	Real, only processed	Real, only processed	5	2	4	4	5	5	3	5	5
2023-04-24 22:32:29	Real, only processed	Real, only processed	False, but convincing	Real, only processed	Real, only processed	Real, only processed	Not sure if it's real or not	Real, but heavily modified	False, but convincing	5	5	2	5	5	5	3	4	2
2023-04-24 22:33:22	Real, only processed	Real, only processed	Real, only processed	Real, but heavily modified	Not sure if it's real or not	Real, but heavily modified	Not sure if it's real or not	Real, only processed	Real, only processed	5	5	5	4	3	4	3	5	5
2023-04-24 22:33:54	Not sure if it's real or not	Real, but heavily modified	Real, but heavily modified	Real, only processed	False, but convincing	Real, but heavily modified	Real, but heavily modified	Completely false	Not sure if it's real or not	3	4	4	5	2	4	4	1	3
2023-04-24 22:33:57	False, but convincing	Real, only processed	Real, only processed	Real, only processed	Real, only processed	Real, only processed	Real, only processed	Real, but heavily modified	Real, only processed	2	5	5	5	5	5	5	4	5
2023-04-24 22:34:51	False, but convincing	False, but convincing	Real, but heavily modified	Real, but heavily modified	Not sure if it's real or not	Real, only processed	False, but convincing	Real, but heavily modified	Real, only processed	2	2	4	4	3	5	2	4	5
2023-04-24 22:37:18	False, but convincing	Real, but heavily modified	Not sure if it's real or not	Completely false	Real, but heavily modified	Real, only processed	Real, only processed	Not sure if it's real or not	Completely false	2	4	3	1	4	5	5	3	1
2023-04-24 22:38:12	Not sure if it's real or not	Real, only processed	Real, only processed	Real, only processed	Not sure if it's real or not	Real, but heavily modified	False, but convincing	False, but convincing	Completely false	3	5	5	5	3	4	2	2	1
2023-04-24 22:38:58	Real, but heavily modified	Not sure if it's real or not	Real, only processed	Real, only processed	Real, only processed	Real, only processed	Real, only processed	Real, only processed	Real, only processed	4	3	5	5	5	5	5	5	5
2023-04-24 22:39:29	Real, but heavily modified	False, but convincing	Real, only processed	False, but convincing	Real, only processed	Real, only processed	Real, but heavily modified	Real, only processed	Real, only processed	4	2	5	2	5	5	4	5	5
2023-04-24 22:40:20	Real, only processed	False, but convincing	Real, but heavily modified	Not sure if it's real or not	Real, only processed	Real, only processed	Real, only processed	Real, but heavily modified	Not sure if it's real or not	5	2	4	3	5	5	5	4	3
2023-04-24 22:43:28	Not sure if it's real or not	Real, only processed	Real, only processed	Real, only processed	Real, only processed	Real, only processed	Completely false	Not sure if it's real or not	Real, only processed	3	5	5	5	5	5	1	3	5
2023-04-24 22:43:48	Real, only processed	False, but convincing	Real, only processed	Real, only processed	Real, only processed	Real, only processed	Real, only processed	False, but convincing	False, but convincing	5	2	5	5	5	5	5	2	2
2023-04-24 22:44:43	Real, only processed	Real, only processed	Real, only processed	Real, only processed	False, but convincing	Real, only processed	Real, only processed	False, but convincing	False, but convincing	5	5	5	5	2	5	5	2	2
2023-04-24 22:45:30	Real, only processed	False, but convincing	Not sure if it's real or not	Real, only processed	Not sure if it's real or not	Real, only processed	Real, but heavily modified	Completely false	Real, only processed	5	2	3	5	3	5	4	1	5
2023-04-24 22:48:19	Real, only processed	Not sure if it's real or not	Real, but heavily modified	False, but convincing	Real, but heavily modified	Real, only processed	Completely false	Completely false	False, but convincing	5	3	4	2	4	5	1	1	2
2023-04-24 22:48:21	Completely false	Real, but heavily modified	Real, but heavily modified	Real, only processed	Real, but heavily modified	Real, only processed	Not sure if it's real or not	Real, but heavily modified	Completely false	1	4	4	5	4	5	3	4	1
2023-04-24 22:51:11	Real, but heavily modified	Not sure if it's real or not	Real, only processed	Real, only processed	Completely false	Not sure if it's real or not	Real, but heavily modified	Completely false	Real, but heavily modified	4	3	5	5	1	3	4	1	4
2023-04-24 22:51:14	False, but convincing	Real, but heavily modified	Real, only processed	Real, only processed	Completely false	Real, only processed	Completely false	Not sure if it's real or not	Completely false	2	4	5	5	1	5	1	3	1
2023-04-24 22:52:36	Real, only processed	False, but convincing	Real, but heavily modified	Real, only processed	False, but convincing	Real, only processed	Completely false	Real, but heavily modified	Real, only processed	5	2	4	5	2	5	1	4	5
2023-04-24 22:52:40	Real, only processed	False, but convincing	Not sure if it's real or not	Real, only processed	Real, only processed	Real, only processed	False, but convincing	False, but convincing	Real, only processed	5	2	3	5	5	5	2	2	5
2023-04-24 22:55:27	Not sure if it's real or not	Real, only processed	Real, but heavily modified	Real, only processed	Real, but heavily modified	Not sure if it's real or not	Real, only processed	False, but convincing	Not sure if it's real or not	3	5	4	5	4	3	5	2	3
2023-04-24 22:56:26	Not sure if it's real or not	Real, only processed	Real, but heavily modified	Real, but heavily modified	Real, only processed	False, but convincing	Not sure if it's real or not	Real, only processed	Real, only processed	3	5	4	4	5	2	3	5	5
2023-04-24 22:59:37	Real, only processed	Not sure if it's real or not	Real, only processed	Not sure if it's real or not	False, but convincing	Real, only processed	Real, only processed	False, but convincing	Real, only processed	5	3	5	3	2	5	5	2	5
2023-04-24 23:03:47	Real, only processed	Completely false	Not sure if it's real or not	Real, only processed	Not sure if it's real or not	Real, only processed	False, but convincing	Completely false	Real, but heavily modified	5	1	3	5	3	5	2	1	4
2023-04-24 23:04:13	Real, only processed	Real, but heavily modified	Real, only processed	Real, only processed	Completely false	Real, only processed	Not sure if it's real or not	Not sure if it's real or not	Not sure if it's real or not	5	4	5	5	1	5	3	3	3
2023-04-24 23:05:40	Real, only processed	False, but convincing	Real, but heavily modified	Real, but heavily modified	Real, only processed	Real, only processed	Not sure if it's real or not	Real, only processed	Real, only processed	5	2	4	4	5	5	3	5	5
2023-04-24 23:06:12	Not sure if it's real or not	False, but convincing	False, but convincing	Not sure if it's real or not	Real, only processed	Real, only processed	Completely false	False, but convincing	Not sure if it's real or not	3	2	2	3	5	5	1	2	3
2023-04-24 23:06:29	Real, only processed	False, but convincing	False, but convincing	Real, only processed	Real, only processed	Real, only processed	Completely false	False, but convincing	Real, only processed	5	2	2	5	5	5	1	2	5
2023-04-24 23:10:57	Real, only processed	Completely false	Not sure if it's real or not	False, but convincing	False, but convincing	Real, only processed	Completely false	False, but convincing	Real, only processed	5	1	3	2	2	5	1	2	5
2023-04-24 23:14:27	Real, only processed	Real, only processed	Real, only processed	Real, only processed	Not sure if it's real or not	Real, only processed	Real, only processed	Real, only processed	Completely false	5	5	5	5	3	5	5	5	1
2023-04-24 23:18:30	Real, only processed	False, but convincing	False, but convincing	Not sure if it's real or not	Real, only processed	Real, but heavily modified	False, but convincing	Not sure if it's real or not	Real, only processed	5	2	2	3	5	4	2	3	5
2023-04-24 23:24:10	Real, only processed	Completely false	Real, only processed	Real, only processed	Not sure if it's real or not	Real, only processed	False, but convincing	Real, but heavily modified	Real, only processed	5	1	5	5	3	5	2	4	5
2023-04-24 23:24:36	Real, only processed	Not sure if it's real or not	Real, only processed	Real, only processed	Real, only processed	Real, only processed	Real, but heavily modified	Real, only processed	Real, only processed	5	3	5	5	5	5	4	5	5
2023-04-24 23:33:40	Not sure if it's real or not	Real, only processed	Real, only processed	Real, only processed	False, but convincing	Real, only processed	Completely false	False, but convincing	Not sure if it's real or not	3	5	5	5	2	5	1	2	3
2023-04-24 23:56:18	Real, only processed	Completely false	Real, only processed	Real, only processed	Not sure if it's real or not	Real, only processed	Not sure if it's real or not	Not sure if it's real or not	Not sure if it's real or not	5	1	5	5	3	5	3	3	3
2023-04-25 00:03:16	Real, only processed	Real, only processed	Real, only processed	Not sure if it's real or not	Not sure if it's real or not	Real, only processed	False, but convincing	Real, only processed	Real, only processed	5	5	5	3	3	5	2	5	5
2023-04-25 00:09:43	Real, but heavily modified	Real, but heavily modified	Real, but heavily modified	Real, but heavily modified	Real, only processed	Real, but heavily modified	Real, only processed	Real, only processed	Real, only processed	4	4	4	4	5	4	5	5	5
2023-04-25 00:15:54	Real, but heavily modified	Real, but heavily modified	Real, but heavily modified	Real, but heavily modified	Real, only processed	Real, but heavily modified	Real, but heavily modified	Real, only processed	Real, but heavily modified	4	4	4	4	5	4	4	5	4
2023-04-25 00:18:26	False, but convincing	False, but convincing	False, but convincing	Real, only processed	Real, only processed	Real, only processed	False, but convincing	Real, only processed	Real, only processed	2	2	2	5	5	5	2	5	5
2023-04-25 00:18:37	Real, only processed	Real, only processed	Real, but heavily modified	False, but convincing	Completely false	False, but convincing	False, but convincing	Completely false	Real, but heavily modified	5	5	4	2	1	2	2	1	4
2023-04-25 00:18:38	Real, but heavily modified	Real, only processed	Real, only processed	Real, but heavily modified	Real, but heavily modified	Real, only processed	Real, only processed	Real, only processed	Real, but heavily modified	4	5	5	4	4	5	5	5	4
2023-04-25 00:19:19	False, but convincing	Real, but heavily modified	Real, only processed	Real, but heavily modified	Real, but heavily modified	Real, only processed	Real, but heavily modified	False, but convincing	Not sure if it's real or not	2	4	5	4	4	5	4	2	3
2023-04-25 00:21:44	Real, only processed	Real, but heavily modified	Real, but heavily modified	Real, only processed	Real, only processed	False, but convincing	Not sure if it's real or not	Real, but heavily modified	Real, but heavily modified	5	4	4	5	5	2	3	4	4
2023-04-25 00:24:48	Real, only processed	Real, but heavily modified	Real, only processed	Real, only processed	Real, only processed	Not sure if it's real or not	Real, only processed	Real, but heavily modified	Real, only processed	5	4	5	5	5	3	5	4	5
2023-04-25 00:24:49	Real, only processed	Completely false	Not sure if it's real or not	Completely false	False, but convincing	Real, but heavily modified	False, but convincing	Not sure if it's real or not	Real, only processed	5	1	3	1	2	4	2	3	5
2023-04-25 00:26:04	Not sure if it's real or not	Completely false	Completely false	Real, only processed	False, but convincing	Real, but heavily modified	Completely false	Completely false	Not sure if it's real or not	3	1	1	5	2	4	1	1	3
2023-04-25 00:35:41	Real, only processed	Real, but heavily modified	Real, but heavily modified	Real, only processed	Real, only processed	Real, only processed	Real, but heavily modified	Real, but heavily modified	Real, only processed	5	4	4	5	5	5	4	4	5
2023-04-25 00:36:37	Real, only processed	Real, only processed	Real, only processed	Real, only processed	Real, only processed	Real, but heavily modified	Real, but heavily modified	Real, only processed	Real, only processed	5	5	5	5	5	4	4	5	5
2023-04-25 00:43:48	Real, only processed	Real, but heavily modified	Real, only processed	Real, only processed	Real, only processed	Real, only processed	False, but convincing	False, but convincing	Real, but heavily modified	5	4	5	5	5	5	2	2	4
2023-04-25 00:54:14	Real, only processed	Real, but heavily modified	Real, but heavily modified	Real, only processed	Real, only processed	Real, only processed	Real, only processed	Real, only processed	Real, only processed	5	4	4	5	5	5	5	5	5
2023-04-25 00:59:13	Real, only processed	False, but convincing	Real, but heavily modified	False, but convincing	Real, but heavily modified	Real, but heavily modified	Not sure if it's real or not	Real, but heavily modified	Real, but heavily modified	5	2	4	2	4	4	3	4	4
2023-04-25 01:09:16	Real, but heavily modified	Not sure if it's real or not	Real, only processed	Real, only processed	Not sure if it's real or not	False, but convincing	Real, only processed	Real, but heavily modified	False, but convincing	4	3	5	5	3	2	5	4	2
2023-04-25 01:14:36	Real, only processed	Real, but heavily modified	Real, only processed	Real, but heavily modified	Completely false	Not sure if it's real or not	Not sure if it's real or not	Real, but heavily modified	Real, only processed	5	4	5	4	1	3	3	4	5
2023-04-25 01:16:36	Completely false	Completely false	Completely false	False, but convincing	Completely false	Completely false	Completely false	Completely false	Completely false	1	1	1	2	1	1	1	1	1
2023-04-25 01:23:48	Real, only processed	Not sure if it's real or not	False, but convincing	Real, only processed	Not sure if it's real or not	Real, only processed	Real, only processed	Not sure if it's real or not	Real, only processed	5	3	2	5	3	5	5	3	5
2023-04-25 02:47:43	Real, only processed	False, but convincing	Not sure if it's real or not	False, but convincing	Real, but heavily modified	Real, only processed	Real, only processed	Not sure if it's real or not	Completely false	5	2	3	2	4	5	5	3	1
2023-04-25 02:59:01	Real, only processed	Real, only processed	Real, only processed	Real, only processed	Real, only processed	Real, only processed	False, but convincing	False, but convincing	Real, only processed	5	5	5	5	5	5	2	2	5
2023-04-25 03:53:21	Real, only processed	False, but convincing	Real, only processed	Real, only processed	Real, but heavily modified	Real, but heavily modified	Real, only processed	Real, only processed	Real, only processed	5	2	5	5	4	4	5	5	5
2023-04-25 05:02:31	Real, only processed	Real, but heavily modified	Real, but heavily modified	Real, only processed	Real, only processed	Real, only processed	Real, but heavily modified	Not sure if it's real or not	Real, only processed	5	4	4	5	5	5	4	3	5
2023-04-25 05:33:15	Real, only processed	Completely false	Not sure if it's real or not	Real, only processed	Not sure if it's real or not	Real, only processed	Not sure if it's real or not	False, but convincing	Real, only processed	5	1	3	5	3	5	3	2	5
2023-04-25 05:33:39	Real, only processed	False, but convincing	Not sure if it's real or not	Real, but heavily modified	Real, only processed	Real, only processed	False, but convincing	Real, only processed	Real, only processed	5	2	3	4	5	5	2	5	5
2023-04-25 06:50:57	Real, only processed	Real, only processed	Real, only processed	Real, only processed	Real, only processed	Real, only processed	Not sure if it's real or not	Not sure if it's real or not	Real, only processed	5	5	5	5	5	5	3	3	5
2023-04-25 07:01:57	Real, only processed	Not sure if it's real or not	Real, only processed	Real, only processed	Completely false	Real, only processed	Not sure if it's real or not	Not sure if it's real or not	Real, only processed	5	3	5	5	1	5	3	3	5
2023-04-25 07:17:54	Not sure if it's real or not	Not sure if it's real or not	Real, but heavily modified	Real, only processed	Real, only processed	Real, only processed	Not sure if it's real or not	Not sure if it's real or not	Not sure if it's real or not	3	3	4	5	5	5	3	3	3
2023-04-25 07:47:26	Real, but heavily modified	Real, only processed	Real, but heavily modified	Not sure if it's real or not	Real, but heavily modified	Real, only processed	False, but convincing	Not sure if it's real or not	Real, but heavily modified	4	5	4	3	4	5	2	3	4
2023-04-25 07:59:35	Not sure if it's real or not	Real, but heavily modified	Real, but heavily modified	Not sure if it's real or not	Real, only processed	False, but convincing	Not sure if it's real or not	Completely false	Real, but heavily modified	3	4	4	3	5	2	3	1	4
2023-04-25 08:05:01	Real, only processed	Real, but heavily modified	Real, but heavily modified	False, but convincing	Real, only processed	Real, only processed	False, but convincing	Real, but heavily modified	Completely false	5	4	4	2	5	5	2	4	1
2023-04-25 08:05:25	Not sure if it's real or not	Real, only processed	False, but convincing	Real, but heavily modified	Completely false	False, but convincing	Real, only processed	Real, but heavily modified	Completely false	3	5	2	4	1	2	5	4	1
2023-04-25 08:10:59	Real, only processed	Real, but heavily modified	Real, but heavily modified	Not sure if it's real or not	Not sure if it's real or not	Real, only processed	False, but convincing	Not sure if it's real or not	Not sure if it's real or not	5	4	4	3	3	5	2	3	3
2023-04-25 08:12:13	Not sure if it's real or not	False, but convincing	Real, only processed	Real, but heavily modified	Not sure if it's real or not	Real, only processed	False, but convincing	Real, only processed	Real, only processed	3	2	5	4	3	5	2	5	5
2023-04-25 08:13:11	Not sure if it's real or not	False, but convincing	Real, only processed	Real, but heavily modified	Not sure if it's real or not	Real, only processed	False, but convincing	Real, only processed	Real, only processed	3	2	5	4	3	5	2	5	5
2023-04-25 08:14:08	Real, only processed	False, but convincing	False, but convincing	Real, but heavily modified	Not sure if it's real or not	Real, only processed	Completely false	False, but convincing	Not sure if it's real or not	5	2	2	4	3	5	1	2	3
2023-04-25 08:39:48	Real, but heavily modified	Real, but heavily modified	Real, only processed	Real, only processed	Real, only processed	Real, only processed	Real, only processed	Real, only processed	Real, only processed	4	4	5	5	5	5	5	5	5
2023-04-25 08:44:46	Real, only processed	Real, only processed	Real, only processed	Real, but heavily modified	False, but convincing	Completely false	Completely false	Not sure if it's real or not	False, but convincing	5	5	5	4	2	1	1	3	2
2023-04-25 08:57:20	Real, but heavily modified	Completely false	Real, only processed	Not sure if it's real or not	False, but convincing	Real, only processed	Real, but heavily modified	Not sure if it's real or not	Not sure if it's real or not	4	1	5	3	2	5	4	3	3
2023-04-25 09:02:25	Not sure if it's real or not	False, but convincing	Real, but heavily modified	Real, only processed	Real, only processed	Real, only processed	False, but convincing	Real, but heavily modified	Real, only processed	3	2	4	5	5	5	2	4	5
2023-04-25 09:14:40	Real, but heavily modified	Real, only processed	Real, only processed	Real, but heavily modified	Real, only processed	Real, only processed	Real, only processed	Real, only processed	Real, only processed	4	5	5	4	5	5	5	5	5
2023-04-25 09:18:43	Not sure if it's real or not	Not sure if it's real or not	Real, only processed	Real, only processed	Real, only processed	Real, but heavily modified	Real, but heavily modified	Real, but heavily modified	Real, only processed	3	3	5	5	5	4	4	4	5
2023-04-25 09:21:22	Not sure if it's real or not	Completely false	Real, but heavily modified	False, but convincing	Real, only processed	Real, only processed	False, but convincing	Not sure if it's real or not	Real, but heavily modified	3	1	4	2	5	5	2	3	4
2023-04-25 09:27:41	Real, only processed	Real, but heavily modified	Real, only processed	Real, but heavily modified	Real, only processed	Real, only processed	Real, only processed	Real, only processed	Real, only processed	5	4	5	4	5	5	5	5	5
2023-04-25 09:33:26	Real, only processed	Not sure if it's real or not	False, but convincing	Not sure if it's real or not	Real, only processed	Real, only processed	Real, only processed	Real, only processed	False, but convincing	5	3	2	3	5	5	5	5	2
2023-04-25 09:34:47	Real, only processed	Real, only processed	Real, only processed	Real, but heavily modified	Real, only processed	Real, only processed	Real, only processed	Real, only processed	Real, only processed	5	5	5	4	5	5	5	5	5
2023-04-25 09:40:25	Not sure if it's real or not	Completely false	Not sure if it's real or not	Real, only processed	Real, only processed	Real, only processed	Completely false	Real, only processed	Real, only processed	3	1	3	5	5	5	1	5	5
2023-04-25 09:41:42	Real, only processed	Real, but heavily modified	Real, only processed	Real, but heavily modified	Not sure if it's real or not	Real, but heavily modified	False, but convincing	Not sure if it's real or not	Real, but heavily modified	5	4	5	4	3	4	2	3	4
2023-04-25 09:47:41	Real, but heavily modified	Completely false	Real, only processed	Real, only processed	Not sure if it's real or not	Real, only processed	Real, only processed	False, but convincing	Real, only processed	4	1	5	5	3	5	5	2	5
2023-04-25 09:49:45	Real, only processed	Completely false	Real, only processed	Real, but heavily modified	Real, only processed	Real, only processed	False, but convincing	Not sure if it's real or not	Real, only processed	5	1	5	4	5	5	2	3	5
2023-04-25 09:55:26	Real, only processed	Completely false	Real, only processed	Real, only processed	Real, only processed	Real, only processed	Real, only processed	Real, but heavily modified	Real, only processed	5	1	5	5	5	5	5	4	5
2023-04-25 09:55:45	False, but convincing	Completely false	Real, only processed	Not sure if it's real or not	Completely false	False, but convincing	False, but convincing	Completely false	False, but convincing	2	1	5	3	1	2	2	1	2
2023-04-25 09:56:58	Real, only processed	Real, only processed	Real, only processed	Real, only processed	Real, only processed	Real, only processed	Real, only processed	Real, only processed	Real, only processed	5	5	5	5	5	5	5	5	5
2023-04-25 09:58:33	Real, but heavily modified	False, but convincing	False, but convincing	Not sure if it's real or not	Not sure if it's real or not	Real, only processed	False, but convincing	False, but convincing	Real, but heavily modified	4	2	2	3	3	5	2	2	4
2023-04-25 10:01:59	Real, only processed	False, but convincing	False, but convincing	Real, but heavily modified	False, but convincing	Real, only processed	Real, but heavily modified	False, but convincing	Real, but heavily modified	5	2	2	4	2	5	4	2	4
2023-04-25 10:02:08	Real, only processed	False, but convincing	Real, only processed	Real, but heavily modified	Real, only processed	Real, only processed	Completely false	Real, only processed	Not sure if it's real or not	5	2	5	4	5	5	1	5	3
2023-04-25 10:04:42	Real, but heavily modified	False, but convincing	Real, only processed	Real, only processed	Real, only processed	Real, only processed	Real, only processed	Real, only processed	Real, only processed	4	2	5	5	5	5	5	5	5
2023-04-25 10:06:32	Real, only processed	Real, but heavily modified	Real, only processed	Real, but heavily modified	Real, only processed	Real, only processed	False, but convincing	Not sure if it's real or not	Real, but heavily modified	5	4	5	4	5	5	2	3	4
2023-04-25 10:07:18	Real, only processed	Real, only processed	Real, only processed	Real, only processed	Real, only processed	Real, only processed	Real, only processed	Real, only processed	Real, only processed	5	5	5	5	5	5	5	5	5
2023-04-25 10:08:21	Real, only processed	False, but convincing	False, but convincing	Real, only processed	Real, only processed	Real, only processed	False, but convincing	False, but convincing	Real, only processed	5	2	2	5	5	5	2	2	5
2023-04-25 10:10:01	Real, only processed	Real, but heavily modified	Real, only processed	Real, only processed	Real, but heavily modified	Real, only processed	False, but convincing	Real, only processed	Real, only processed	5	4	5	5	4	5	2	5	5
2023-04-25 10:11:02	Not sure if it's real or not	False, but convincing	Real, only processed	Real, only processed	False, but convincing	False, but convincing	Completely false	Completely false	Real, but heavily modified	3	2	5	5	2	2	1	1	4
2023-04-25 10:11:18	Not sure if it's real or not	Real, only processed	Real, only processed	Real, only processed	Real, only processed	Real, only processed	Real, only processed	Real, only processed	Real, only processed	3	5	5	5	5	5	5	5	5
2023-04-25 10:12:02	Real, only processed	Real, but heavily modified	Real, only processed	Real, but heavily modified	False, but convincing	Real, only processed	False, but convincing	False, but convincing	Completely false	5	4	5	4	2	5	2	2	1
2023-04-25 10:14:01	Not sure if it's real or not	Completely false	Real, only processed	Real, but heavily modified	Completely false	Real, only processed	Completely false	False, but convincing	False, but convincing	3	1	5	4	1	5	1	2	2
2023-04-25 10:14:53	Real, only processed	False, but convincing	Real, only processed	Real, only processed	Real, only processed	Real, only processed	Not sure if it's real or not	Real, only processed	Real, only processed	5	2	5	5	5	5	3	5	5
2023-04-25 10:15:46	Real, only processed	Real, only processed	Real, but heavily modified	Real, but heavily modified	Real, only processed	Real, only processed	Real, but heavily modified	Real, only processed	Real, but heavily modified	5	5	4	4	5	5	4	5	4
2023-04-25 10:16:17	Not sure if it's real or not	Completely false	Completely false	False, but convincing	Completely false	Real, only processed	Completely false	Completely false	Real, but heavily modified	3	1	1	2	1	5	1	1	4
2023-04-25 10:23:08	Real, only processed	False, but convincing	Real, only processed	Not sure if it's real or not	False, but convincing	Real, only processed	Completely false	Not sure if it's real or not	Real, only processed	5	2	5	3	2	5	1	3	5
2023-04-25 10:23:25	Real, only processed	Real, but heavily modified	Real, only processed	Real, only processed	Real, only processed	Real, only processed	Real, but heavily modified	Real, only processed	Real, only processed	5	4	5	5	5	5	4	5	5
2023-04-25 10:23:46	Not sure if it's real or not	False, but convincing	Real, only processed	Real, only processed	Not sure if it's real or not	Real, only processed	Completely false	False, but convincing	Real, only processed	3	2	5	5	3	5	1	2	5
2023-04-25 10:31:22	Real, only processed	False, but convincing	Real, only processed	Real, only processed	Real, only processed	Real, only processed	Real, but heavily modified	Real, only processed	Real, only processed	5	2	5	5	5	5	4	5	5
2023-04-25 10:32:30	Real, only processed	False, but convincing	Real, only processed	Real, only processed	False, but convincing	Real, only processed	Real, but heavily modified	Real, only processed	Real, only processed	5	2	5	5	2	5	4	5	5
2023-04-25 10:35:25	Real, only processed	False, but convincing	Real, only processed	Real, only processed	Not sure if it's real or not	Real, only processed	False, but convincing	Not sure if it's real or not	Not sure if it's real or not	5	2	5	5	3	5	2	3	3
2023-04-25 10:49:10	Real, only processed	Real, but heavily modified	Real, only processed	Not sure if it's real or not	Real, only processed	Real, only processed	Not sure if it's real or not	Real, only processed	Real, only processed	5	4	5	3	5	5	3	5	5
2023-04-25 10:51:45	Real, only processed	Real, but heavily modified	Real, only processed	Not sure if it's real or not	Real, only processed	Real, only processed	Real, only processed	Real, but heavily modified	Not sure if it's real or not	5	4	5	3	5	5	5	4	3
2023-04-25 10:54:05	Real, but heavily modified	Not sure if it's real or not	Not sure if it's real or not	False, but convincing	False, but convincing	Real, only processed	Completely false	Completely false	Completely false	4	3	3	2	2	5	1	1	1
2023-04-25 10:54:30	Real, only processed	Completely false	Real, only processed	Real, only processed	False, but convincing	Real, only processed	Completely false	Not sure if it's real or not	Real, but heavily modified	5	1	5	5	2	5	1	3	4
2023-04-25 10:56:10	Real, but heavily modified	Real, but heavily modified	Real, only processed	Real, only processed	Not sure if it's real or not	Real, only processed	Completely false	Real, only processed	Real, only processed	4	4	5	5	3	5	1	5	5
2023-04-25 10:56:37	Real, only processed	Real, only processed	Real, only processed	Real, but heavily modified	Real, only processed	Real, only processed	Real, only processed	Real, only processed	Real, only processed	5	5	5	4	5	5	5	5	5
2023-04-25 10:59:48	Real, only processed	Not sure if it's real or not	Real, only processed	Real, only processed	Real, only processed	Real, only processed	Real, but heavily modified	Real, but heavily modified	Real, only processed	5	3	5	5	5	5	4	4	5
2023-04-25 10:59:58	Real, only processed	False, but convincing	Real, only processed	Real, only processed	False, but convincing	Real, only processed	Completely false	Real, only processed	Real, only processed	5	2	5	5	2	5	1	5	5
2023-04-25 12:19:29	False, but convincing	Real, only processed	Real, only processed	Real, only processed	Completely false	Real, only processed	Real, but heavily modified	Real, but heavily modified	Real, only processed	2	5	5	5	1	5	4	4	5
2023-04-25 12:22:13	Real, only processed	False, but convincing	Real, only processed	Real, but heavily modified	Real, but heavily modified	Real, only processed	Not sure if it's real or not	Real, only processed	Real, only processed	5	2	5	4	4	5	3	5	5
2023-04-25 12:22:17	Real, only processed	False, but convincing	Real, only processed	Real, only processed	Real, but heavily modified	Real, only processed	Not sure if it's real or not	Real, only processed	Real, only processed	5	2	5	5	4	5	3	5	5
2023-04-25 12:37:18	Real, only processed	Real, but heavily modified	Real, only processed	Real, only processed	Real, only processed	Real, only processed	Real, only processed	Real, but heavily modified	False, but convincing	5	4	5	5	5	5	5	4	2
2023-04-25 12:39:27	Real, only processed	Not sure if it's real or not	Real, only processed	Not sure if it's real or not	False, but convincing	Real, only processed	Completely false	False, but convincing	Real, only processed	5	3	5	3	2	5	1	2	5
2023-04-25 12:46:40	Real, only processed	Completely false	Not sure if it's real or not	False, but convincing	Completely false	Real, but heavily modified	Completely false	False, but convincing	Not sure if it's real or not	5	1	3	2	1	4	1	2	3
2023-04-25 13:02:19	Real, only processed	Real, but heavily modified	Real, only processed	Real, only processed	Real, only processed	Real, only processed	Real, only processed	Real, only processed	False, but convincing	5	4	5	5	5	5	5	5	2
2023-04-25 13:04:38	Real, only processed	Real, but heavily modified	Real, only processed	Real, but heavily modified	Not sure if it's real or not	Real, only processed	Completely false	Real, only processed	Real, only processed	5	4	5	4	3	5	1	5	5
2023-04-25 13:13:12	Real, only processed	Real, only processed	False, but convincing	Real, only processed	False, but convincing	Real, only processed	Not sure if it's real or not	Real, but heavily modified	Real, only processed	5	5	2	5	2	5	3	4	5
2023-04-25 13:23:34	Real, only processed	Real, but heavily modified	Real, only processed	Real, only processed	Real, but heavily modified	Real, only processed	Real, but heavily modified	Real, but heavily modified	Real, only processed	5	4	5	5	4	5	4	4	5
2023-04-25 13:31:23	Real, only processed	Not sure if it's real or not	Real, only processed	Real, only processed	Real, only processed	Real, only processed	Real, but heavily modified	Real, only processed	Real, but heavily modified	5	3	5	5	5	5	4	5	4
2023-04-25 13:37:47	Real, only processed	Real, only processed	Real, only processed	Real, but heavily modified	Real, only processed	Real, only processed	False, but convincing	Real, only processed	Real, only processed	5	5	5	4	5	5	2	5	5
2023-04-25 13:45:45	Real, only processed	Real, but heavily modified	Real, only processed	Real, but heavily modified	Real, only processed	Real, only processed	Not sure if it's real or not	Real, only processed	Real, only processed	5	4	5	4	5	5	3	5	5
2023-04-25 13:50:32	Not sure if it's real or not	Not sure if it's real or not	Real, only processed	Real, only processed	Real, but heavily modified	Real, only processed	Real, only processed	Real, but heavily modified	Not sure if it's real or not	3	3	5	5	4	5	5	4	3
2023-04-25 13:52:09	Not sure if it's real or not	Completely false	Real, but heavily modified	Real, only processed	Real, only processed	Real, only processed	Real, but heavily modified	Real, only processed	Real, only processed	3	1	4	5	5	5	4	5	5
2023-04-25 14:16:36	Real, only processed	Real, but heavily modified	Completely false	Completely false	Real, but heavily modified	Completely false	Not sure if it's real or not	False, but convincing	Not sure if it's real or not	5	4	1	1	4	1	3	2	3
2023-04-25 14:18:01	Real, only processed	Completely false	False, but convincing	Real, only processed	Real, only processed	Real, only processed	False, but convincing	Real, only processed	Real, only processed	5	1	2	5	5	5	2	5	5
2023-04-25 14:18:40	Real, only processed	Real, but heavily modified	Real, only processed	Real, only processed	Real, but heavily modified	Real, only processed	Real, but heavily modified	Real, only processed	Real, only processed	5	4	5	5	4	5	4	5	5
2023-04-25 14:29:37	Real, only processed	Not sure if it's real or not	Not sure if it's real or not	Not sure if it's real or not	Not sure if it's real or not	Real, only processed	False, but convincing	False, but convincing	Not sure if it's real or not	5	3	3	3	3	5	2	2	3
2023-04-25 14:50:51	Real, only processed	Not sure if it's real or not	Not sure if it's real or not	Not sure if it's real or not	Not sure if it's real or not	Not sure if it's real or not	Not sure if it's real or not	Not sure if it's real or not	Completely false	5	3	3	3	3	3	3	3	1
2023-04-25 15:09:08	Real, but heavily modified	Not sure if it's real or not	Real, but heavily modified	Real, but heavily modified	Real, only processed	Real, but heavily modified	False, but convincing	Not sure if it's real or not	Real, but heavily modified	4	3	4	4	5	4	2	3	4
2023-04-25 15:09:53	Real, but heavily modified	False, but convincing	Completely false	Real, only processed	Not sure if it's real or not	Real, only processed	False, but convincing	False, but convincing	Real, only processed	4	2	1	5	3	5	2	2	5
2023-04-25 15:10:52	Real, only processed	Real, but heavily modified	Not sure if it's real or not	Real, only processed	Not sure if it's real or not	Real, only processed	False, but convincing	Real, only processed	Real, only processed	5	4	3	5	3	5	2	5	5
2023-04-25 15:16:11	False, but convincing	Completely false	Real, but heavily modified	Real, only processed	False, but convincing	Real, only processed	False, but convincing	Real, only processed	Completely false	2	1	4	5	2	5	2	5	1
2023-04-25 15:21:35	False, but convincing	Completely false	Real, only processed	Real, only processed	Completely false	Real, only processed	Completely false	Real, only processed	False, but convincing	2	1	5	5	1	5	1	5	2
2023-04-25 15:50:27	Real, only processed	Real, only processed	Real, only processed	Real, but heavily modified	Real, only processed	Real, only processed	Real, only processed	Real, only processed	Real, but heavily modified	5	5	5	4	5	5	5	5	4
2023-04-25 16:15:22	False, but convincing	Real, only processed	Real, but heavily modified	Real, only processed	False, but convincing	Real, only processed	False, but convincing	Real, but heavily modified	Real, only processed	2	5	4	5	2	5	2	4	5
2023-04-25 16:25:13	Real, only processed	Real, but heavily modified	Real, only processed	Real, but heavily modified	Real, but heavily modified	Real, only processed	Real, only processed	Real, but heavily modified	Real, but heavily modified	5	4	5	4	4	5	5	4	4
2023-04-25 16:33:38	Real, but heavily modified	Real, only processed	Real, only processed	Real, only processed	Real, only processed	Real, only processed	Real, only processed	Not sure if it's real or not	Real, only processed	4	5	5	5	5	5	5	3	5
2023-04-25 16:35:10	Real, only processed	Completely false	Real, only processed	False, but convincing	Real, only processed	Real, only processed	False, but convincing	Not sure if it's real or not	Real, only processed	5	1	5	2	5	5	2	3	5
2023-04-25 16:42:46	Real, only processed	False, but convincing	Real, only processed	Completely false	Real, only processed	Real, only processed	Real, but heavily modified	Real, but heavily modified	Real, only processed	5	2	5	1	5	5	4	4	5
2023-04-25 17:13:37	Not sure if it's real or not	False, but convincing	Real, only processed	Completely false	Real, only processed	Real, only processed	Real, only processed	Not sure if it's real or not	Real, only processed	3	2	5	1	5	5	5	3	5
2023-04-25 17:17:57	Real, but heavily modified	False, but convincing	Real, only processed	Real, only processed	Completely false	Real, only processed	Completely false	False, but convincing	Not sure if it's real or not	4	2	5	5	1	5	1	2	3
2023-04-25 17:39:07	Real, only processed	Real, only processed	Real, only processed	Real, only processed	Completely false	Real, only processed	Completely false	False, but convincing	Real, only processed	5	5	5	5	1	5	1	2	5
2023-04-25 17:46:49	Real, only processed	Completely false	False, but convincing	False, but convincing	Real, only processed	Real, only processed	False, but convincing	False, but convincing	Real, only processed	5	1	2	2	5	5	2	2	5
2023-04-25 17:47:27	Not sure if it's real or not	False, but convincing	Real, only processed	Completely false	Real, but heavily modified	Real, only processed	Completely false	Completely false	Real, but heavily modified	3	2	5	1	4	5	1	1	4
2023-04-25 17:55:24	Real, only processed	Real, only processed	Real, only processed	Real, but heavily modified	Not sure if it's real or not	Real, only processed	Not sure if it's real or not	Not sure if it's real or not	Real, only processed	5	5	5	4	3	5	3	3	5
2023-04-25 17:56:44	Real, only processed	Real, only processed	Real, only processed	Real, but heavily modified	Real, only processed	Real, only processed	Real, only processed	Real, only processed	Real, only processed	5	5	5	4	5	5	5	5	5
2023-04-25 17:58:09	Not sure if it's real or not	Real, only processed	Real, only processed	Real, only processed	Real, only processed	Real, only processed	Real, but heavily modified	Real, only processed	Real, only processed	3	5	5	5	5	5	4	5	5
2023-04-25 19:12:35	Real, only processed	Real, but heavily modified	False, but convincing	Real, but heavily modified	Completely false	Real, only processed	Real, but heavily modified	Real, only processed	False, but convincing	5	4	2	4	1	5	4	5	2
2023-04-25 20:35:51	Real, only processed	Not sure if it's real or not	False, but convincing	Real, but heavily modified	Real, but heavily modified	Completely false	Not sure if it's real or not	Not sure if it's real or not	Completely false	5	3	2	4	4	1	3	3	1
2023-04-25 20:37:32	Real, but heavily modified	Real, only processed	Real, only processed	Real, only processed	Real, only processed	Real, only processed	Real, only processed	Real, only processed	Not sure if it's real or not	4	5	5	5	5	5	5	5	3
2023-04-25 21:43:37	Real, only processed	Real, only processed	Real, only processed	Real, only processed	Real, only processed	Real, only processed	Completely false	Real, only processed	Real, only processed	5	5	5	5	5	5	1	5	5
2023-04-25 21:52:11	Real, only processed	Real, only processed	Real, only processed	Real, only processed	Real, but heavily modified	Real, only processed	Real, but heavily modified	Real, but heavily modified	Real, only processed	5	5	5	5	4	5	4	4	5
2023-04-25 23:11:18	Real, but heavily modified	False, but convincing	Real, but heavily modified	Real, but heavily modified	Real, but heavily modified	Real, only processed	Not sure if it's real or not	Completely false	Real, only processed	4	2	4	4	4	5	3	1	5
2023-04-25 23:32:55	Real, only processed	Real, only processed	Real, only processed	Real, only processed	Real, only processed	Real, only processed	Real, only processed	Real, only processed	Real, only processed	5	5	5	5	5	5	5	5	5
2023-04-25 23:54:58	Not sure if it's real or not	False, but convincing	Real, only processed	Real, only processed	Completely false	Real, only processed	Completely false	Completely false	False, but convincing	3	2	5	5	1	5	1	1	2
2023-04-26 04:11:05	Real, only processed	Not sure if it's real or not	Real, only processed	False, but convincing	Real, only processed	Real, only processed	False, but convincing	False, but convincing	Real, but heavily modified	5	3	5	2	5	5	2	2	4
2023-04-26 07:06:23	Real, only processed	Completely false	Completely false	Not sure if it's real or not	Completely false	Not sure if it's real or not	Completely false	Completely false	Not sure if it's real or not	5	1	1	3	1	3	1	1	3
2023-04-26 07:12:20	Real, only processed	False, but convincing	Not sure if it's real or not	Real, only processed	Completely false	Real, only processed	Completely false	Real, but heavily modified	Real, only processed	5	2	3	5	1	5	1	4	5
2023-04-26 07:33:36	Real, only processed	Real, only processed	Real, only processed	Real, only processed	Real, only processed	Real, only processed	Completely false	Real, only processed	Real, only processed	5	5	5	5	5	5	1	5	5
2023-04-26 08:39:32	Not sure if it's real or not	Real, only processed	Real, only processed	False, but convincing	Real, only processed	Real, only processed	Completely false	Completely false	Real, but heavily modified	3	5	5	2	5	5	1	1	4
2023-04-26 09:13:53	Not sure if it's real or not	Completely false	Real, only processed	Real, but heavily modified	Real, only processed	False, but convincing	Completely false	False, but convincing	Not sure if it's real or not	3	1	5	4	5	2	1	2	3
2023-04-26 09:17:44	Real, only processed	Not sure if it's real or not	Real, only processed	Not sure if it's real or not	Real, only processed	Real, only processed	False, but convincing	False, but convincing	Real, only processed	5	3	5	3	5	5	2	2	5
2023-04-26 09:20:23	Real, only processed	Real, only processed	Real, only processed	Real, only processed	Real, only processed	Real, only processed	Real, only processed	Real, only processed	Real, only processed	5	5	5	5	5	5	5	5	5
2023-04-26 09:22:31	Completely false	False, but convincing	Real, only processed	Real, but heavily modified	Completely false	Real, only processed	False, but convincing	Completely false	Real, but heavily modified	1	2	5	4	1	5	2	1	4
2023-04-26 09:57:58	Real, only processed	False, but convincing	Real, only processed	False, but convincing	Completely false	Real, but heavily modified	Not sure if it's real or not	Real, only processed	Real, only processed	5	2	5	2	1	4	3	5	5
