# Supplementary material for: Revisiting the debate: documenting biodiversity in the age of digital and artificially generated images
Source: Copernicus journal article supplement (doi:10.5194/we-23-135-2023), 2023-12-07
Supplement: Supplementary file 2 [file we-23-135-2023-supplement.zip › Supplementary file S1.docx]

**Supplementary file S1 -** Suplementary file S1 - Database of the survey, each line is the response of one interviewed person. Respective values are in columns K to S for calculation of descriptive statistics

Acess link: <https://docs.google.com/spreadsheets/d/1HF1sX8jnkqlCyJ0jJPCep-jAGEy4Uy2eeqJnA4o4LZ8/edit?usp=sharing>
